# Supplementary material
Source: PubMed Central journal article supplement (PMC4360375)

## Supporting information

### A binding mode hypothesis of tiagabine confirms liothyronine effect on $\gamma$ -aminobutyric acid transporter 1 (GAT1)

Andreas Jurik<sup>1</sup>, Barbara Zdrzil<sup>1</sup>, Marion Holy<sup>2</sup>, Thomas Stockner<sup>2</sup>, Harald H. Sitte<sup>2</sup>, Gerhard F. Ecker\*<sup>1</sup>

<sup>1</sup>University of Vienna, Department of Pharmaceutical Chemistry, Division of Drug Design and Medicinal Chemistry, Althanstraße 14, A-1090 Vienna, Austria.

<sup>2</sup>Medical University of Vienna, Institute of Pharmacology, Center of Biomolecular Medicine and Pharmacology, Währingerstraße 13a, A-1090 Vienna, Austria.

## Table of Contents

|                                |            |
|--------------------------------|------------|
| <b>Tables</b>                  | <b>S2</b>  |
| <b>Figures</b>                 | <b>S6</b>  |
| <b>References</b>              | <b>S10</b> |
| <b>Appendix: Spectral Data</b> | <b>S11</b> |

| model    | DOPE[2]   | DFire[3] | QMEAN[4] | ZScore | PROCHECK[1] |        |        |         |
|----------|-----------|----------|----------|--------|-------------|--------|--------|---------|
|          |           |          |          |        | core        | allow. | gener. | disall. |
| 7        | -75432.88 | -894.54  | 0.457    | -3.704 | 94.4        | 4.7    | 0.4    | 0.4     |
| 22       | -75120.70 | -892.59  | 0.455    | -3.723 | 93.6        | 6.0    | 0.4    | 0.0     |
| 34       | -75127.98 | -891.54  | 0.454    | -3.737 | 93.8        | 5.3    | 0.7    | 0.2     |
| 38       | -75029.60 | -889.12  | 0.423    | -4.110 | 93.1        | 5.8    | 0.7    | 0.4     |
| 55       | -75581.91 | -896.77  | 0.461    | -3.652 | 92.7        | 6.2    | 0.9    | 0.2     |
| 57       | -75156.31 | -891.34  | 0.431    | -4.011 | 93.1        | 5.8    | 1.1    | 0.0     |
| 77       | -75214.13 | -891.46  | 0.465    | -3.609 | 93.3        | 5.6    | 0.7    | 0.4     |
| 81       | -75454.95 | -892.85  | 0.466    | -3.592 | 92.9        | 5.8    | 1.1    | 0.2     |
| 82       | -75010.28 | -888.80  | 0.477    | -3.464 | 91.3        | 6.2    | 1.3    | 1.1     |
| 96       | -75220.47 | -892.17  | 0.456    | -3.707 | 93.6        | 5.6    | 0.7    | 0.2     |
| template |           | -999.51  | 0.585    | -2.180 | 94.9        | 5.1    | 0.0    | 0.0     |

**Table S1.** DOPE and SWISSModel[5] results for ten top-ranked hGAT1 homology models. PROCHECK results reporting % of the residues in core, allowed, generally allowed and disallowed regions. Template structure 3F3A was assessed for comparison. Model 55 was further investigated being best in DOPE and DFire scores, model 82 according to QMEAN and ZScore, model 7 having best PROCHECK results. Visual inspection of polar residues in putative membrane areas, as well as side chain orientations of reportedly important amino acids, finally led to the selection of model 55.

| Name            | ph4 fit score | ph4 rank | docking score | docking rank | chosen |
|-----------------|---------------|----------|---------------|--------------|--------|
| tiagabine       | 46.96         | 2        | -12.06        | 1            | x      |
| bepotastine     | 47.08         | 1        | -9.91         | 2            | x      |
| liothyronine    | 46.54         | 4        | -9.39         | 4            | x      |
| levothyroxine   | 46.58         | 3        | -8.37         | 6            |        |
| dextrothyroxine | 46.15         | 7        | -8.76         | 5            |        |
| ramipril        | 46.31         | 6        | -9.57         | 3            | x      |
| perindopril     | 46.43         | 5        | -6.67         | 7            |        |
| lymecycline     | 46.10         | 8        | (no pose)     | -            |        |

**Table S2.** Score ranking of DrugBank hit compounds and primary selection for testing. Upon detection of liothyronine's GAT modulating potential, the other two related derivatives (L- and D-thyroxine) and reverse liothyronine (3,3',5'-triiodothyronine), not present in the database, were additionally purchased for rationalizing thyroid hormone SAR in GAT-1.

|            | <b>% uptake</b> | <b>std.dev.</b> | <b>MACCS</b> | <b>FP2</b> | <b>FP4</b> |
|------------|-----------------|-----------------|--------------|------------|------------|
| <b>12</b>  | 105.0           | 8.2             | 0.464        | 0.220      | 0.520      |
| <b>13</b>  | 93.2            | 9.6             | 0.485        | 0.228      | 0.650      |
| <b>14</b>  | 99.0            | 4.9             | 0.585        | 0.238      | 0.550      |
| <b>15</b>  | 103.5           | 11.0            | 0.500        | 0.176      | 0.565      |
| <b>16</b>  | 95.1            | 12.8            | 0.615        | 0.220      | 0.579      |
| <b>17</b>  | 102.5           | 7.8             | 0.635        | 0.262      | 0.579      |
| <b>18</b>  | 79.3            | 7.9             | 0.515        | 0.212      | 0.524      |
| <b>19</b>  | 91.0            | 21.4            | 0.415        | 0.170      | 0.500      |
| <b>20</b>  | 93.9            | 9.6             | 0.525        | 0.175      | 0.545      |
| <b>21</b>  | 94.7            | 7.9             | 0.590        | 0.388      | 0.619      |
| <b>22</b>  | 103.7           | 9.8             | 0.480        | 0.216      | 0.600      |
| <b>23</b>  | 107.7           | 10.0            | 0.352        | 0.114      | 0.364      |
| <b>24</b>  | 104.9           | 5.4             | 0.294        | 0.280      | 0.458      |
| <b>25</b>  | 103.8           | 5.0             | 0.533        | 0.269      | 0.600      |
| <b>26</b>  | 107.7           | 9.6             | 0.492        | 0.263      | 0.500      |
| <b>27a</b> | 31.5            | 5.4             | 0.254        | 0.147      | 0.409      |
| <b>27b</b> | 54.2            | 4.1             | 0.254        | 0.147      | 0.409      |
| <b>27c</b> | 126.6           | 5.1             | 0.254        | 0.147      | 0.409      |
| <b>27d</b> | 88.6            | 16.8            | 0.254        | 0.147      | 0.409      |

**Table S3.** Activity values (% remaining uptake in presence of 100  $\mu$ M of **5**) and Tanimoto coefficients, derived from substructure-based (MACCS and FP4) and path-based (FP2) fingerprints, of the tested screening compounds. Average MACCS Tanimoto coefficients to Tiagabine, complete screening databases: DrugBank: 0.346; Enamine Advanced & HTS collections: 0.396.

| compound | vendor        | catalog number | purity (%) | purity data | id. data |
|----------|---------------|----------------|------------|-------------|----------|
| 12       | Enamine       | Z728862468     | 100        | LC/MS       | NMR      |
| 13       | Enamine       | Z1459949930    | 99.0       | LC/MS       | NMR      |
| 14       | Enamine       | Z1459991978    | 100        | LC/MS       | NMR      |
| 15       | Enamine       | Z1459967721    | 95.6       | LC/MS       | NMR      |
| 16       | Enamine       | Z1459983749    | 100        | LC/MS       | NMR      |
| 17       | Enamine       | Z1465347397    | 100        | LC/MS       | NMR      |
| 18       | Enamine       | Z1459927845    | 100        | LC/MS       | NMR      |
| 19       | Enamine       | Z1523065505    | 100        | LC/MS       | NMR      |
| 20       | Enamine       | Z1459962146    | 100        | LC/MS       | NMR      |
| 21       | Enamine       | Z1459930349    | 100        | LC/MS       | NMR      |
| 22       | Enamine       | Z53113106      | 100        | LC/MS       | NMR      |
| 23       | Enamine       | Z317025968     | 98.3       | LC/MS       | NMR      |
| 24       | Enamine       | Z1541759893    | 100        | LC/MS       | NMR      |
| 27       | AvaChem       | 2571           | 99.9       | CoA         | CoA      |
| 26       | AvaChem       | 2593           | 100        | CoA         | CoA      |
| 27a      | Sigma-Aldrich | T2877          | 98.0       | CoA         | CoA      |
| 27b      | Fluka         | 89430          | 99.1       | HPLC        | CoA      |
| 27c      | Fluka         | 89425          | 98.2       | HPLC        | CoA      |
| 27d      | Sigma-Aldrich | T0281          | 97.9       | CoA         | CoA      |

**Table S4.** Specifications of screening compounds and method of verification, as provided by vendors. Purity stated by coupled liquid chromatography/mass spectrometry (LC/MS), high performance liquid chromatography (HPLC) or certificate of analysis (CoA). Identity stated by nuclear magnetic resonance (NMR) spectra or CoA.

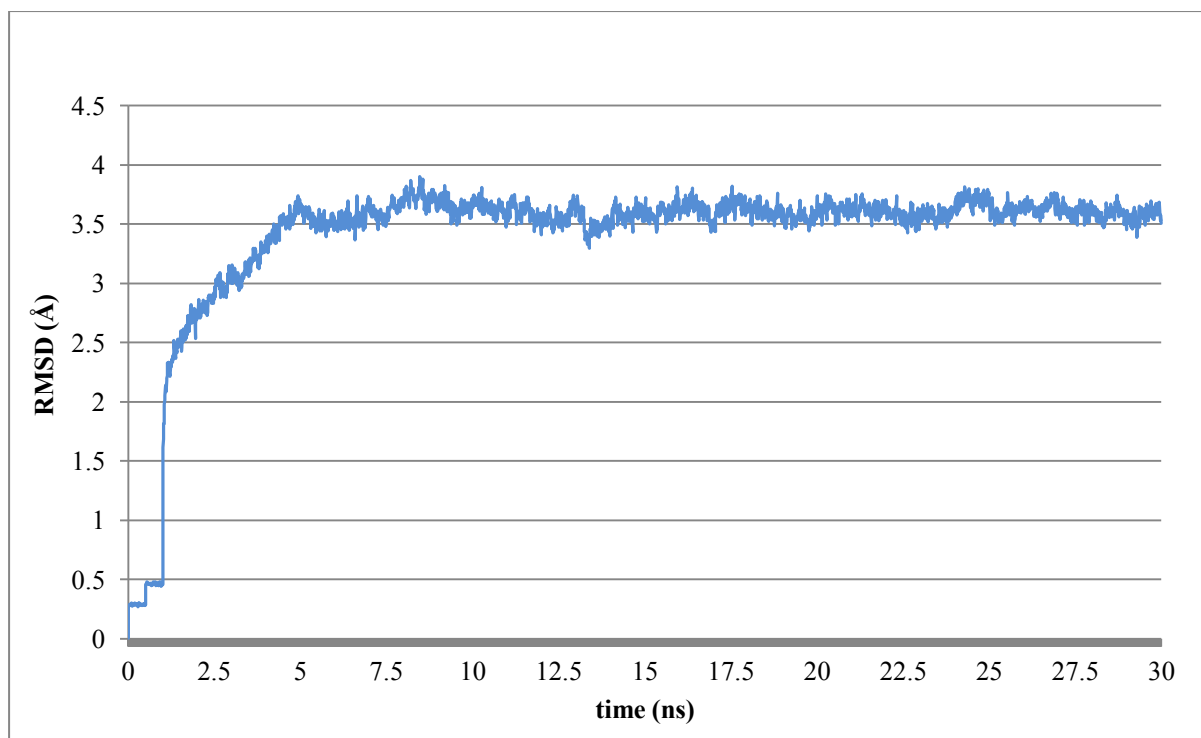

**Figure S1.** Protein backbone RMSD during 30 ns of MD simulation of the complex with tiagabine. Release phase visible in two 500 ps steps of the first nanosecond.

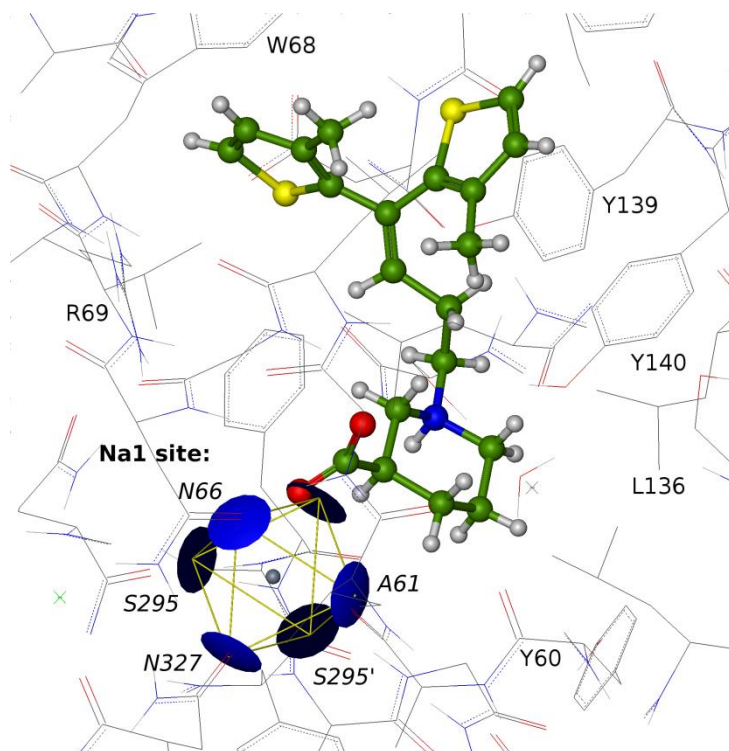

**Figure S2.** Octahedral geometry of the sodium site. Coordination points taken by the ligand carboxylic acid, backbone carbonyl groups of A61 and S295, as well as side chains of N66, S295 and N327 are highlighted in blue.

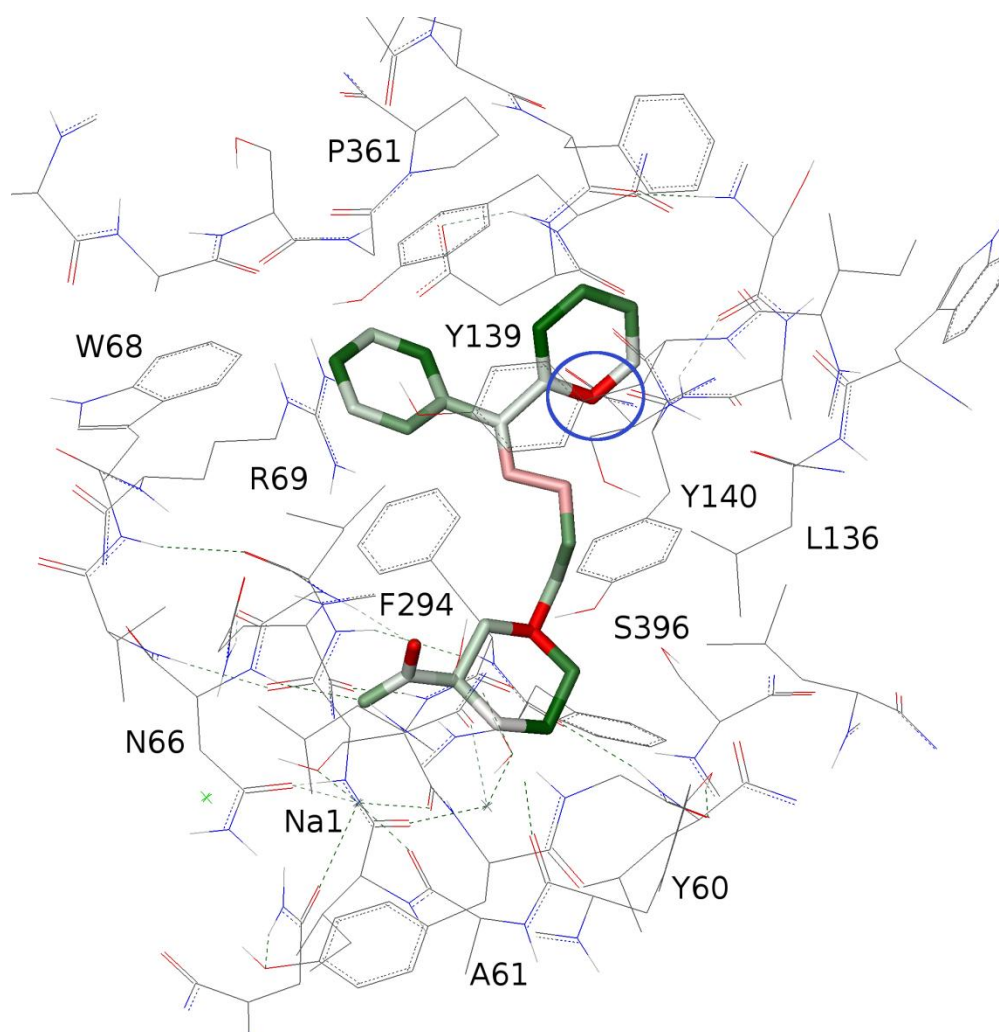

**Figure S3.** Compound **11** assessed with HYDE.[6] Example for an unfavorably located pyridine nitrogen atom in context with one of the hydrophobic cavities is highlighted in red / blue circle.



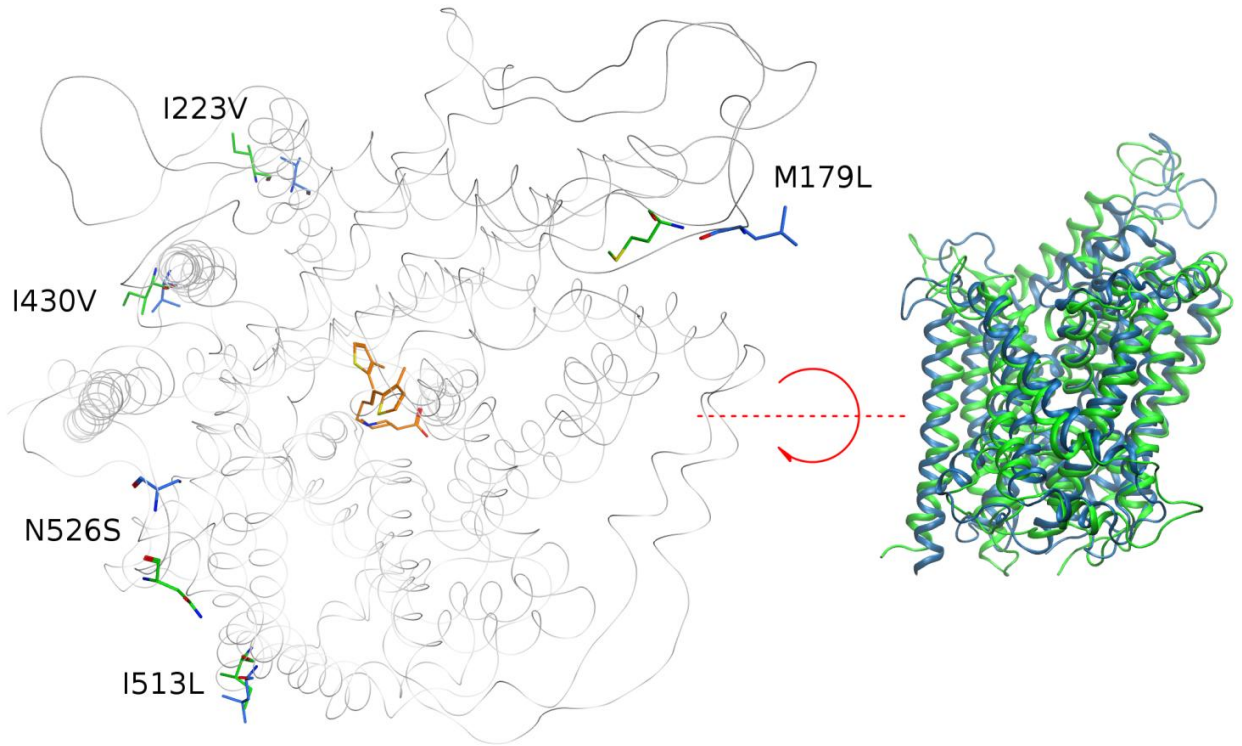

**Figure S4.** Non-conserved residues hGAT-1 (green) – rGAT-1 (blue). View from extracellular side.

## REFERENCES

1. Laskowski, R.A., et al., *PROCHECK: a program to check the stereochemical quality of protein structures*. J. Appl. Cryst., 1993. **26**(2): p. 283-291.
2. Shen, M.Y. and A. Sali, *Statistical potential for assessment and prediction of protein structures*. Protein Sci, 2006. **15**(11): p. 2507-24.
3. Zhou, H. and Y. Zhou, *Distance-scaled, finite ideal-gas reference state improves structure-derived potentials of mean force for structure selection and stability prediction*. Protein Sci., 2002. **11**(11): p. 2714-26.
4. Benkert, P., M. Biasini, and T. Schwede, *Toward the estimation of the absolute quality of individual protein structure models*. Bioinformatics, 2011. **27**(3): p. 343-50.
5. Arnold, K., et al., *The SWISS-MODEL workspace: a web-based environment for protein structure homology modelling*. Bioinformatics, 2006. **22**(2): p. 195-201.
6. Reulecke, I., et al., *Towards an integrated description of hydrogen bonding and dehydration: decreasing false positives in virtual screening with the HYDE scoring function*. ChemMedChem, 2008. **3**(6): p. 885-97.

Z728862468

R1919891

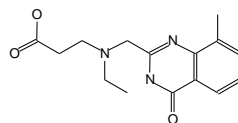

R1919891 C15H19N3O3 289.33

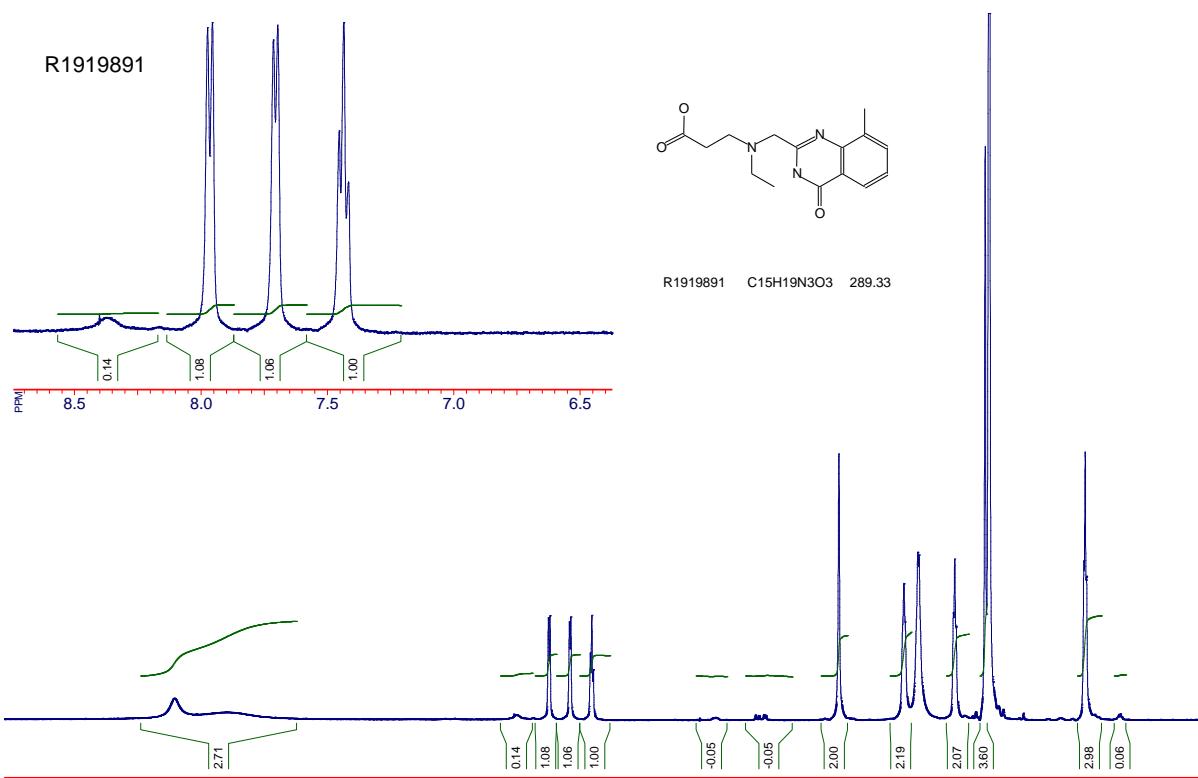

|                     |                   |                  |           |                            |            |
|---------------------|-------------------|------------------|-----------|----------------------------|------------|
| File name: R1919891 | Operator: Reutova | SF: 399.9703 MHz | NSC: 0    | PW: 7.50 usec, RG: 24      | St: 32768  |
| Date: 27-Aug-2011   | Solvent: dms0-d6  | SW: 6803 Hz      | TE: 293 K | AQ: 1.33 sec, RD: 0.00 sec | *R1919891* |

Z1459949930

5804504

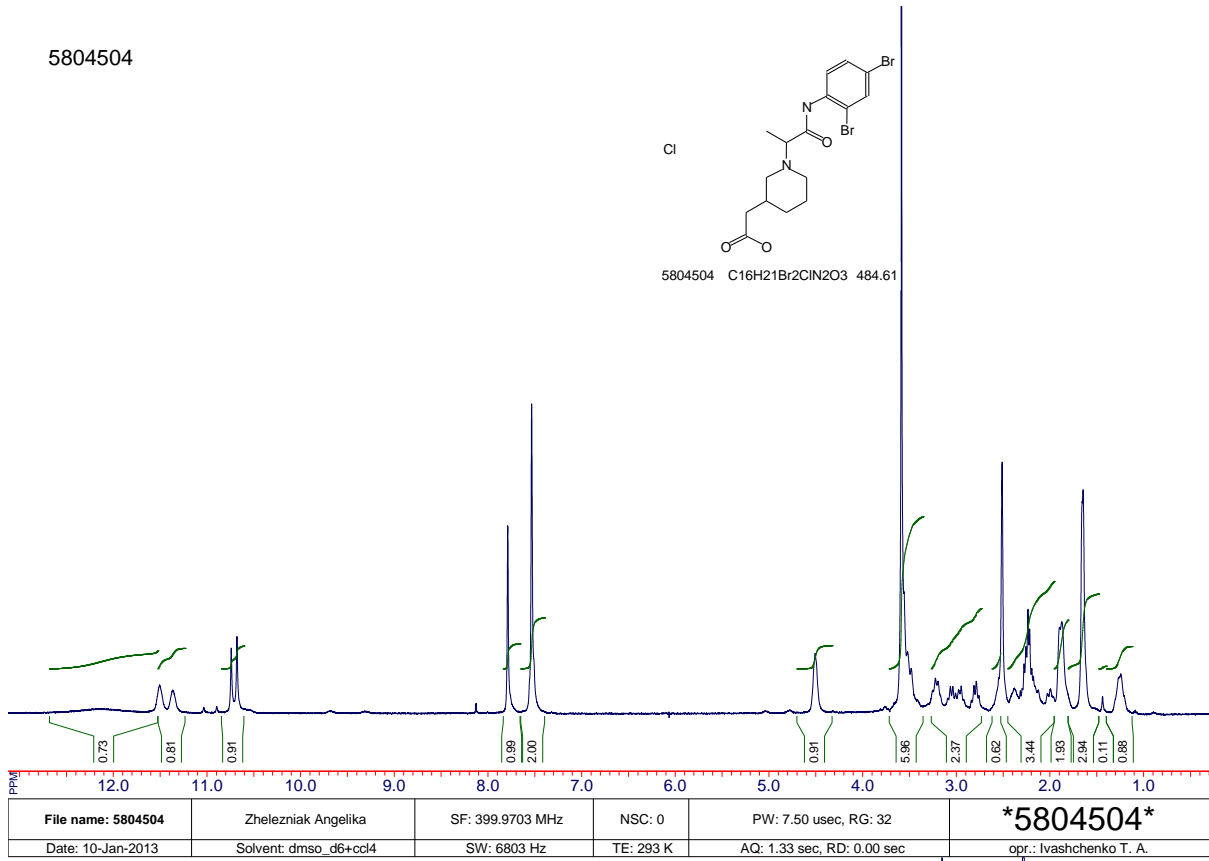

T7633702

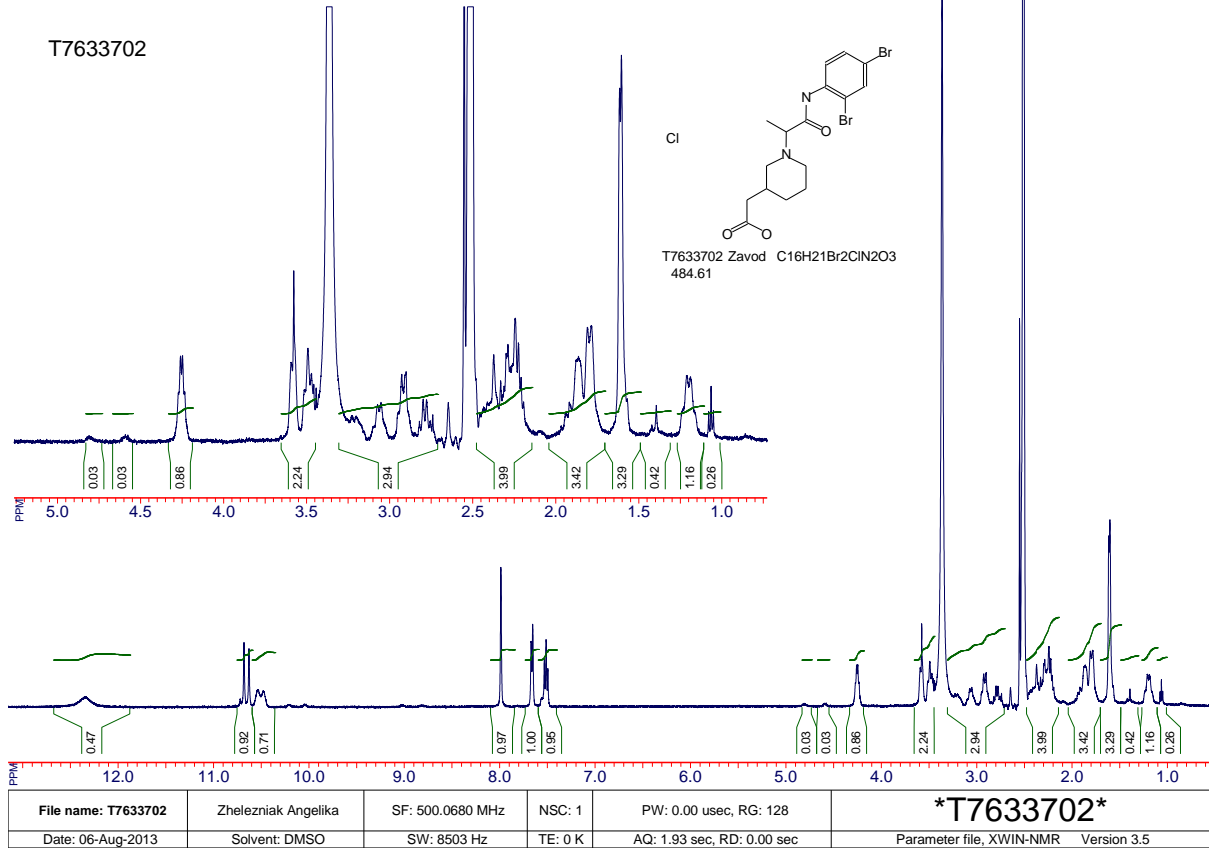

Z1459991978

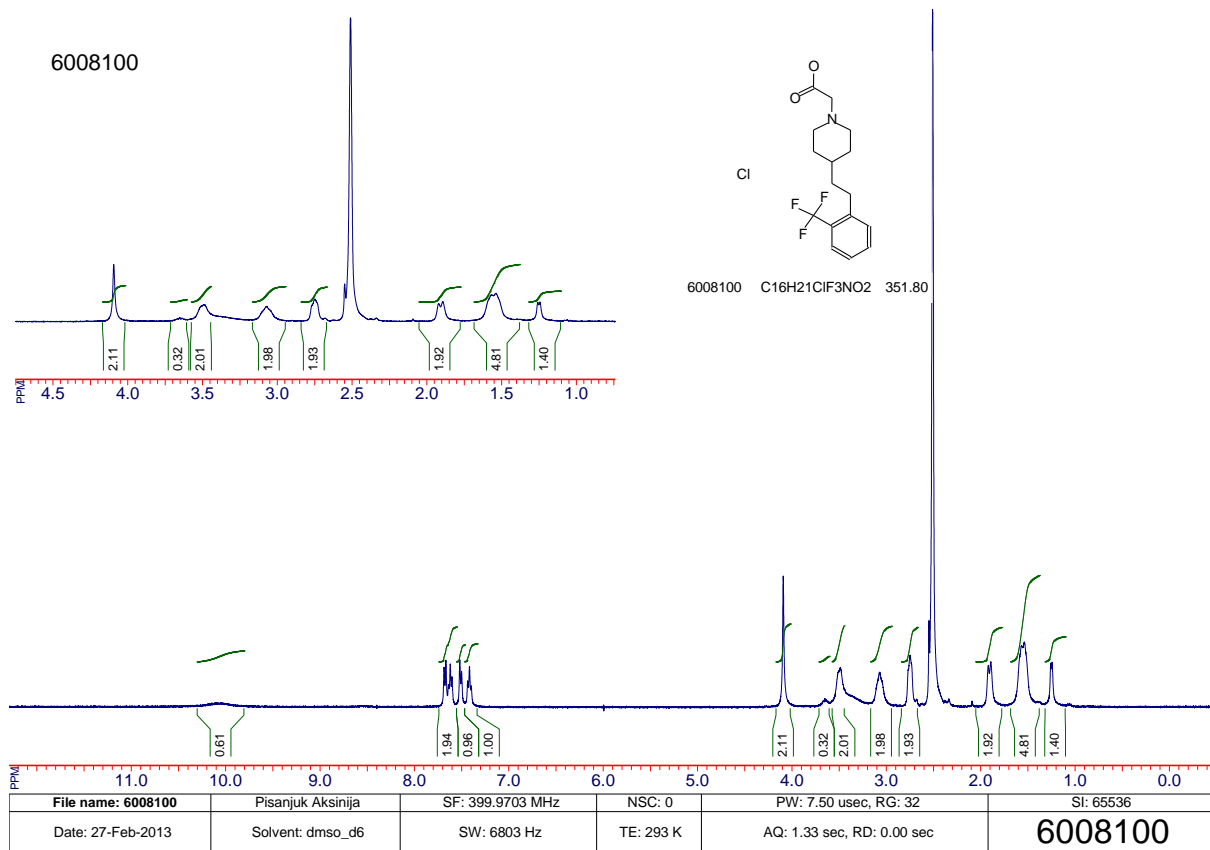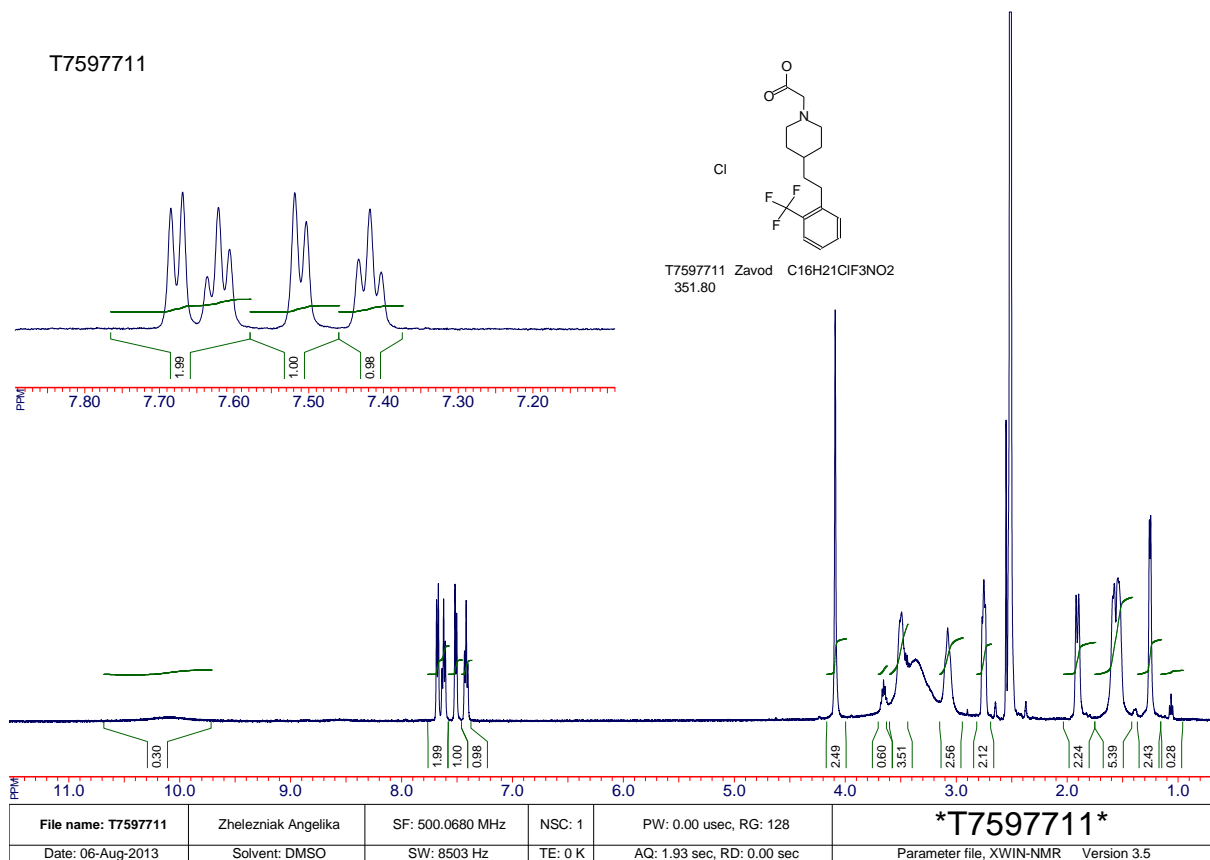

Z1459967721

6008276

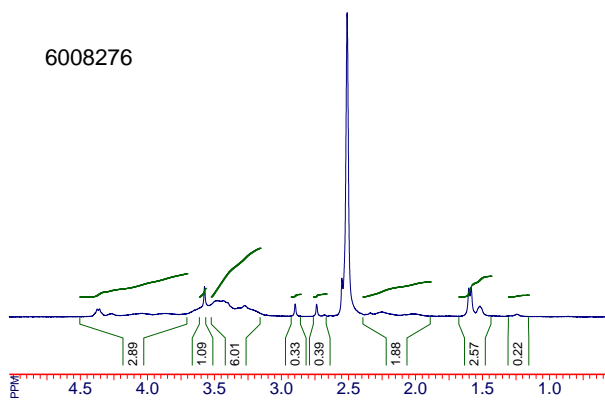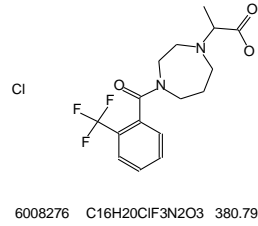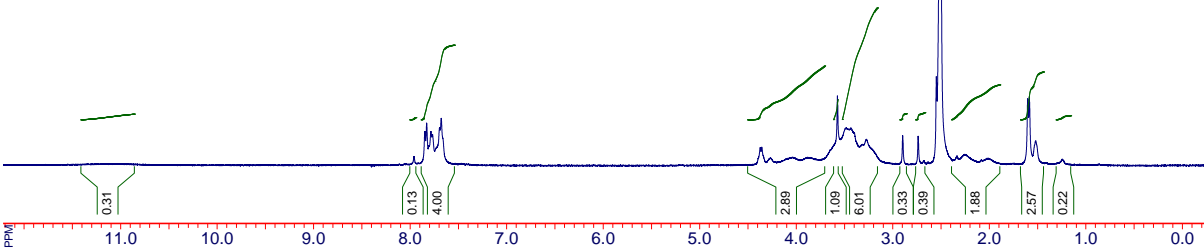

|                    |                       |                  |           |                            |                |
|--------------------|-----------------------|------------------|-----------|----------------------------|----------------|
| File name: 6008276 | Pisanjuk Aksinija     | SF: 399.9703 MHz | NSC: 0    | PW: 7.50 usec, RG: 32      | SI: 65536      |
| Date: 12-Mar-2013  | Solvent: dmsd_d6+ccl4 | SW: 6803 Hz      | TE: 293 K | AQ: 1.33 sec, RD: 0.00 sec | <b>6008276</b> |

T7605493

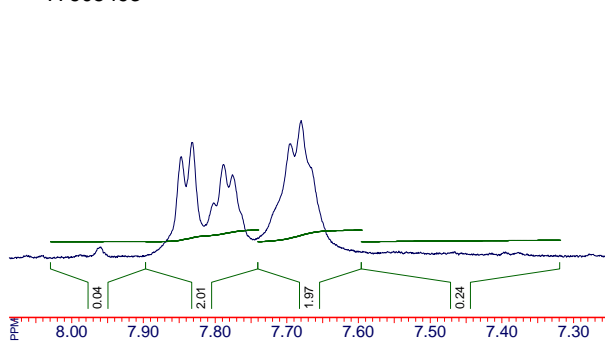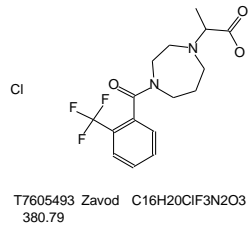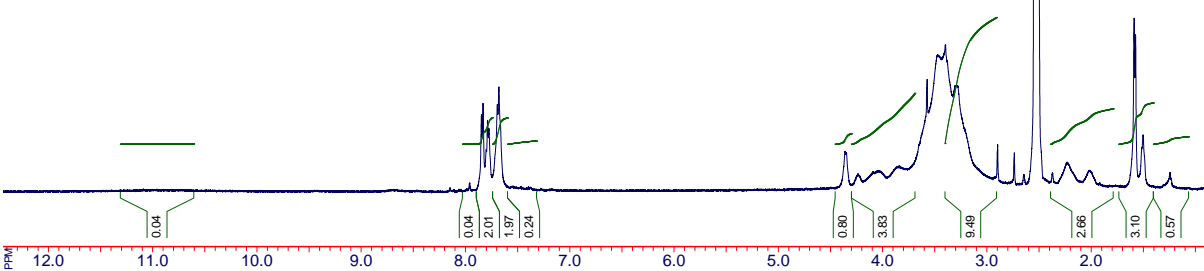

|                     |                     |                  |         |                            |                                      |
|---------------------|---------------------|------------------|---------|----------------------------|--------------------------------------|
| File name: T7605493 | Zhelezniak Angelika | SF: 500.0680 MHz | NSC: 1  | PW: 0.00 usec, RG: 128     | <b>*T7605493*</b>                    |
| Date: 06-Aug-2013   | Solvent: DMSO       | SW: 8503 Hz      | TE: 0 K | AQ: 1.93 sec, RD: 0.00 sec | Parameter file, XWIN-NMR Version 3.5 |

Z1459983749

6008186\$2

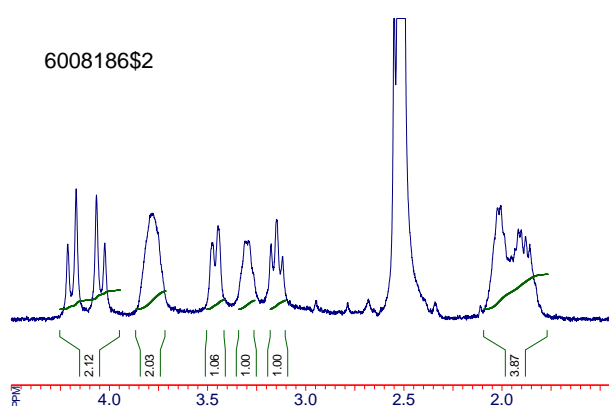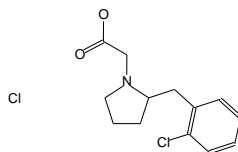

6008186\$2 C13H17Cl2NO2 290.19

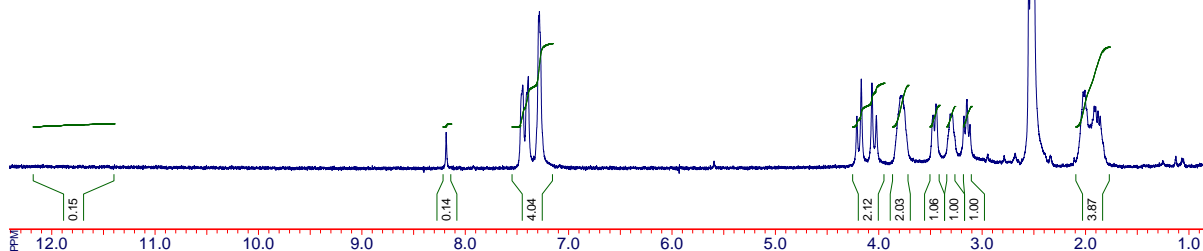

|                       |                       |                  |           |                            |                     |
|-----------------------|-----------------------|------------------|-----------|----------------------------|---------------------|
| File name: 6008186\$2 | Kinder Tatyana        | SF: 399.9703 MHz | NSC: 0    | PW: 7.50 usec, RG: 32      | SI: 65536           |
| Date: 15-Mar-2013     | Solvent: dmso-d6+cc14 | SW: 6803 Hz      | TE: 293 K | AQ: 1.33 sec, RD: 0.00 sec | <b>*6008186\$2*</b> |

Z1465347397

T7623147

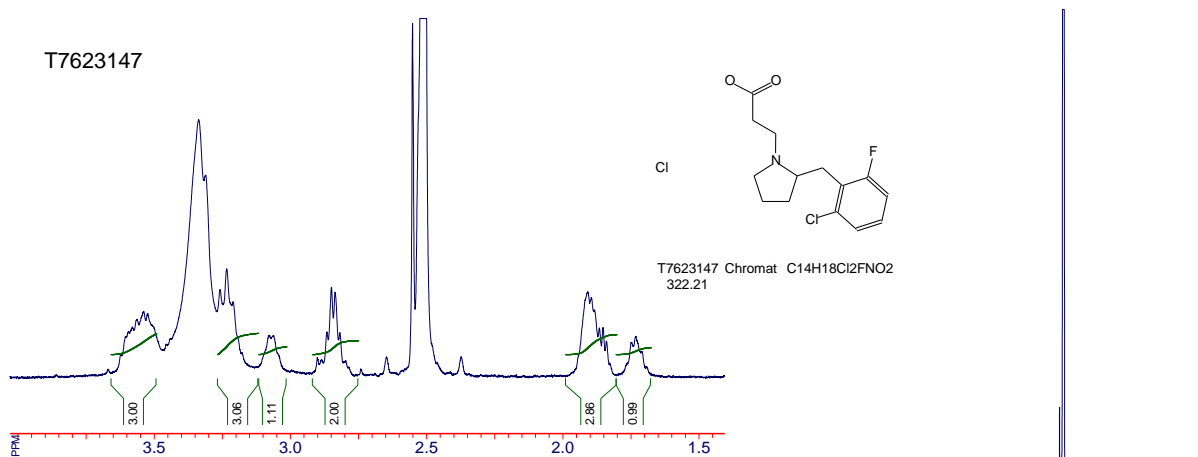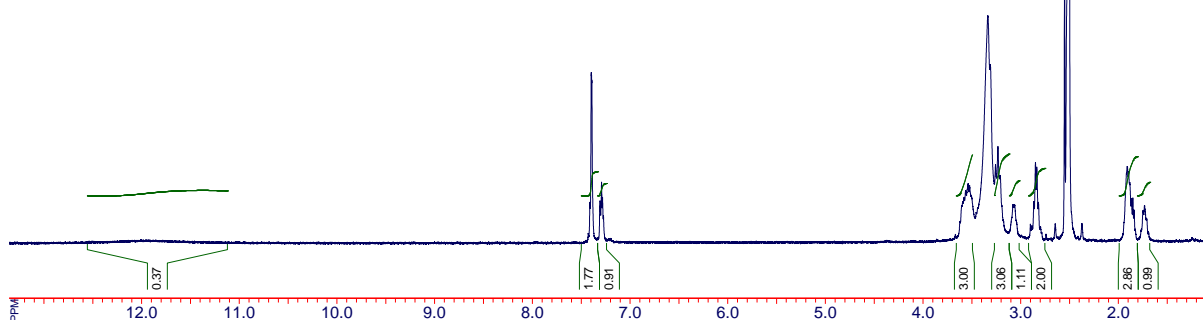

|                     |                     |                  |         |                            |                   |
|---------------------|---------------------|------------------|---------|----------------------------|-------------------|
| File name: T7623147 | Zhelezniak Angelika | SF: 500.0680 MHz | NSC: 1  | PW: 0.00 usec, RG: 128     | <b>*T7623147*</b> |
| Date: 06-Aug-2013   | Solvent: DMSO       | SW: 8503 Hz      | TE: 0 K | AQ: 1.93 sec, RD: 0.00 sec |                   |

6008064\$1

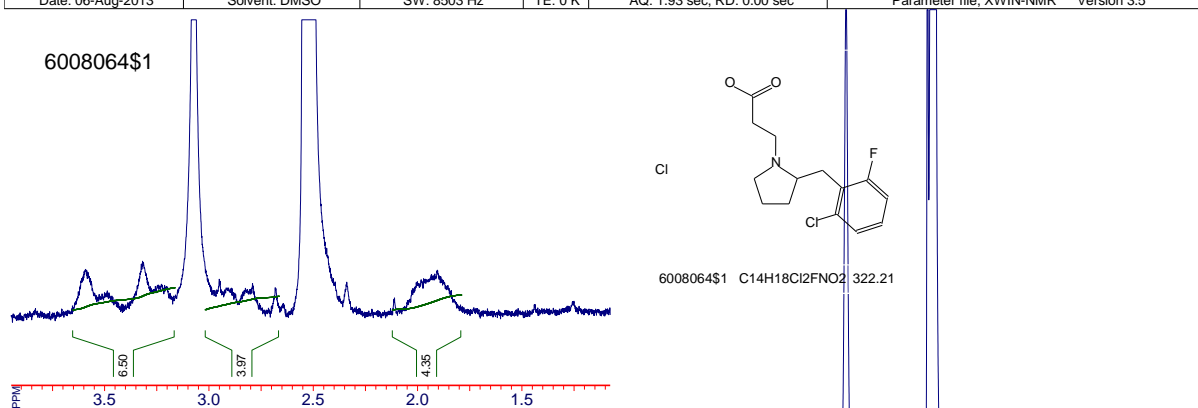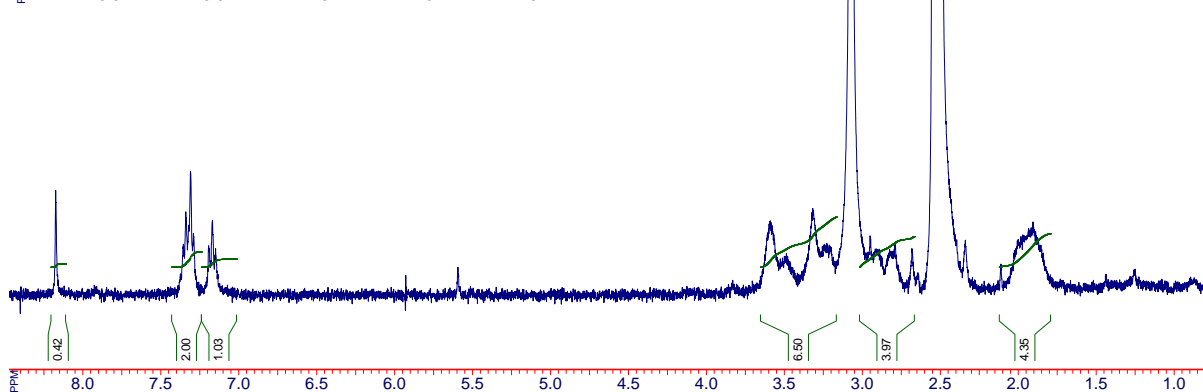

|                       |                       |                  |           |                            |                     |
|-----------------------|-----------------------|------------------|-----------|----------------------------|---------------------|
| File name: 6008064\$1 | Kinder Tatyana        | SF: 399.9703 MHz | NSC: 0    | PW: 7.50 usec, RG: 32      | SI: 65536           |
| Date: 15-Mar-2013     | Solvent: dms0_d6+cc14 | SW: 6803 Hz      | TE: 293 K | AQ: 1.33 sec, RD: 0.00 sec | <b>*6008064\$1*</b> |



Z1459927845

6008199\$23

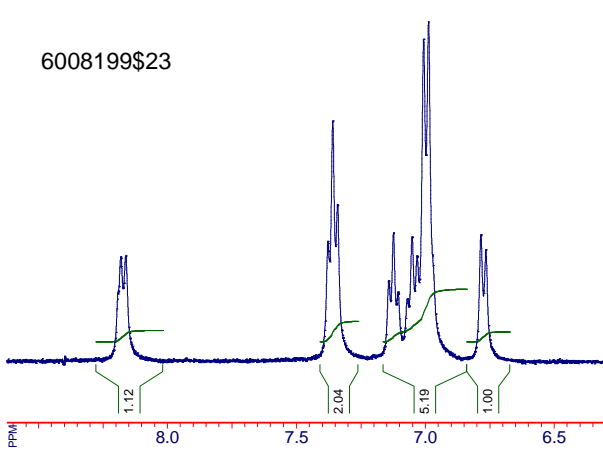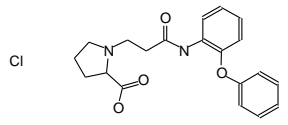

6008199\$23 C20H23ClN2O4 390.87

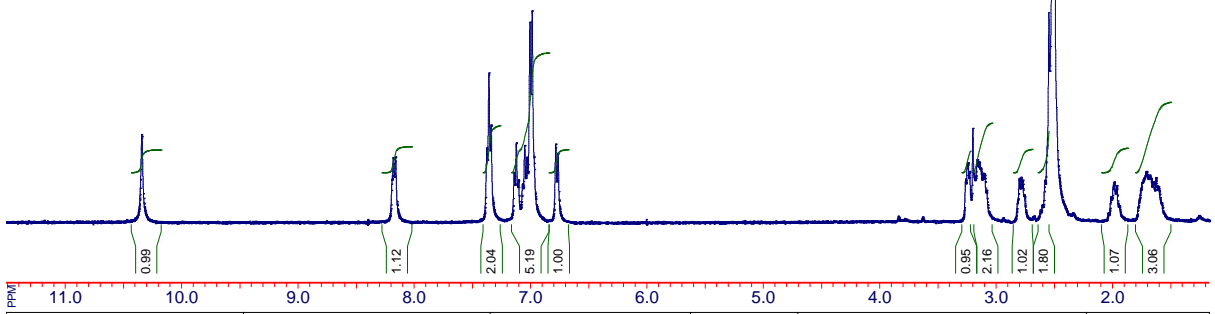

|                        |                       |                  |           |                            |            |
|------------------------|-----------------------|------------------|-----------|----------------------------|------------|
| File name: 6008199\$23 | Operator: Victorova   | SF: 399.9703 MHz | NSC: 0    | PW: 7.50 usec, RG: 32      | SI: 65536  |
| Date: 25-Mar-2013      | Solvent: dms0_d6+ccl4 | SW: 6803 Hz      | TE: 293 K | AQ: 1.33 sec, RD: 0.00 sec | Trach I.O. |

Z1523065505

5937301\$2

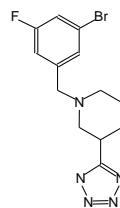

5937301\$2 C<sub>13</sub>H<sub>15</sub>BrFN<sub>5</sub> 340.20

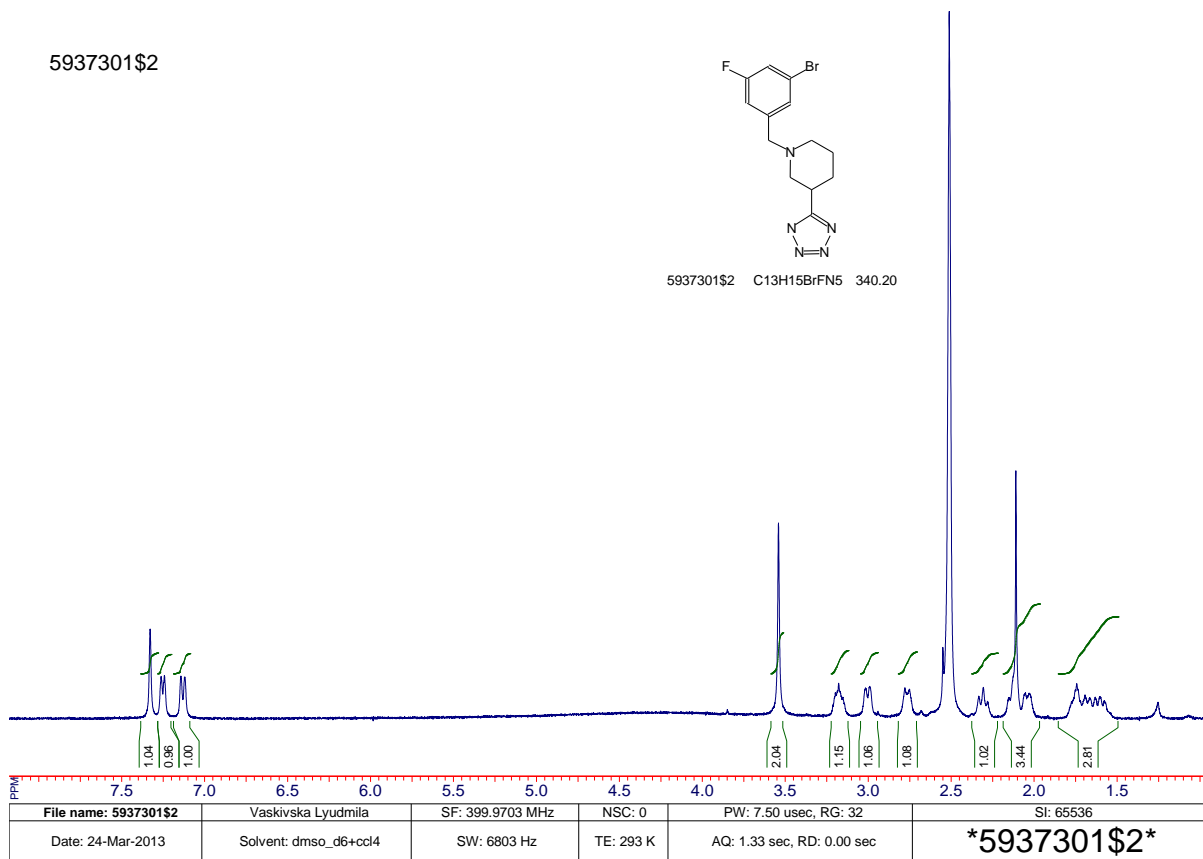

Z1459962146

T7576066

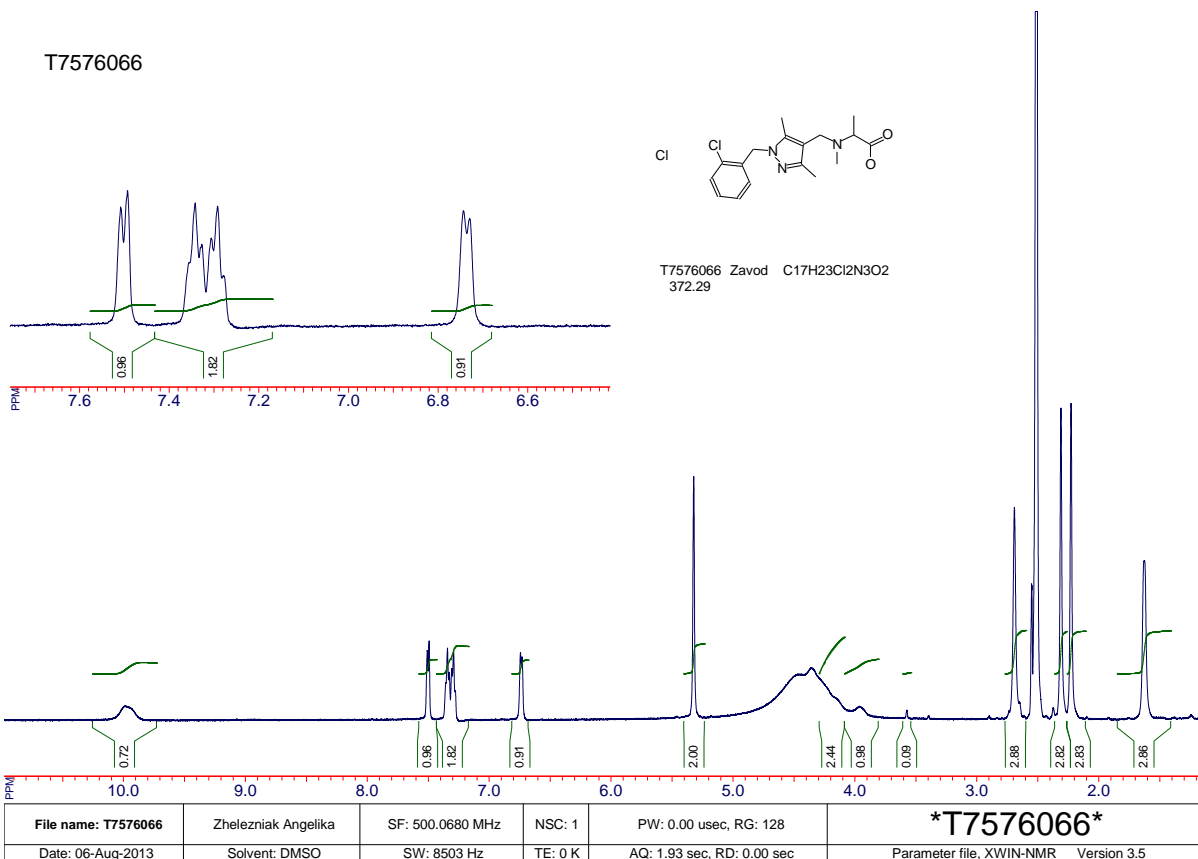

6008184

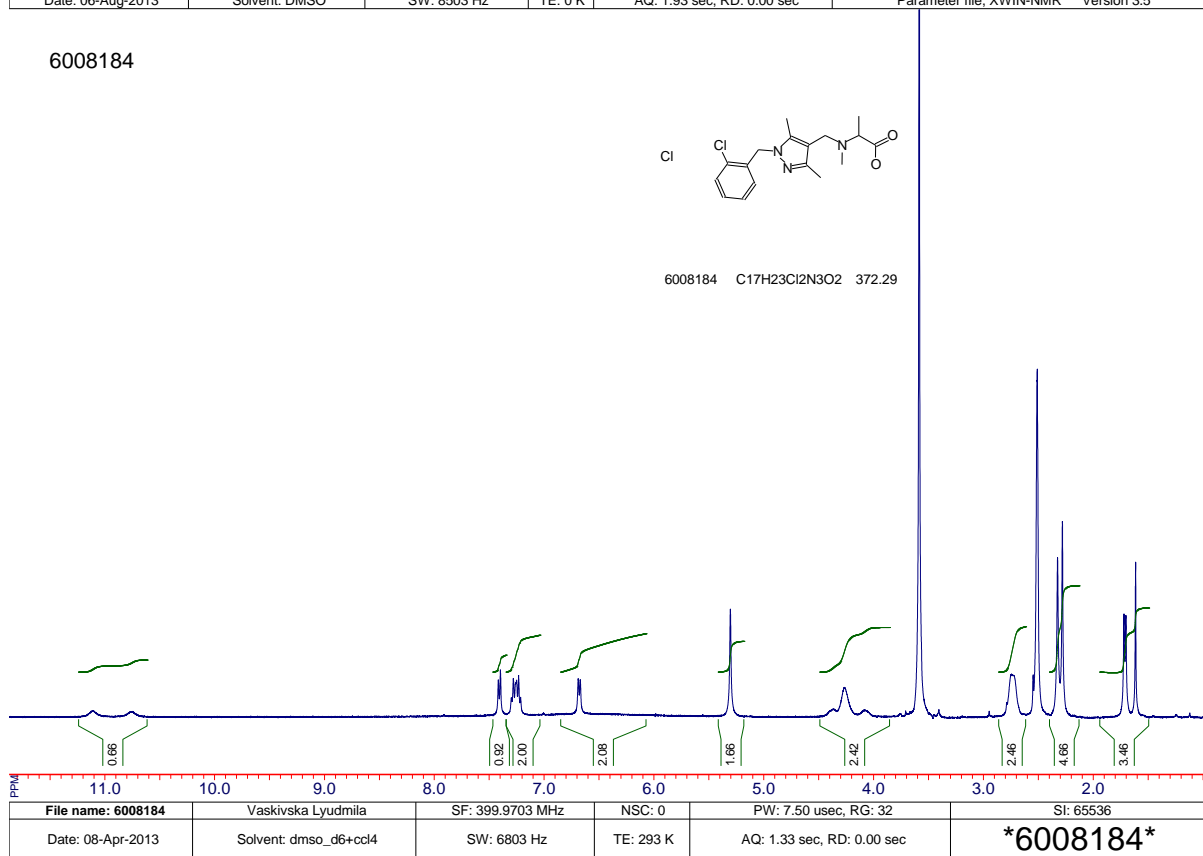

Z1459930349

T7699336

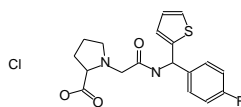

T7699336 Zavod C18H20ClFN2O3S  
398.88

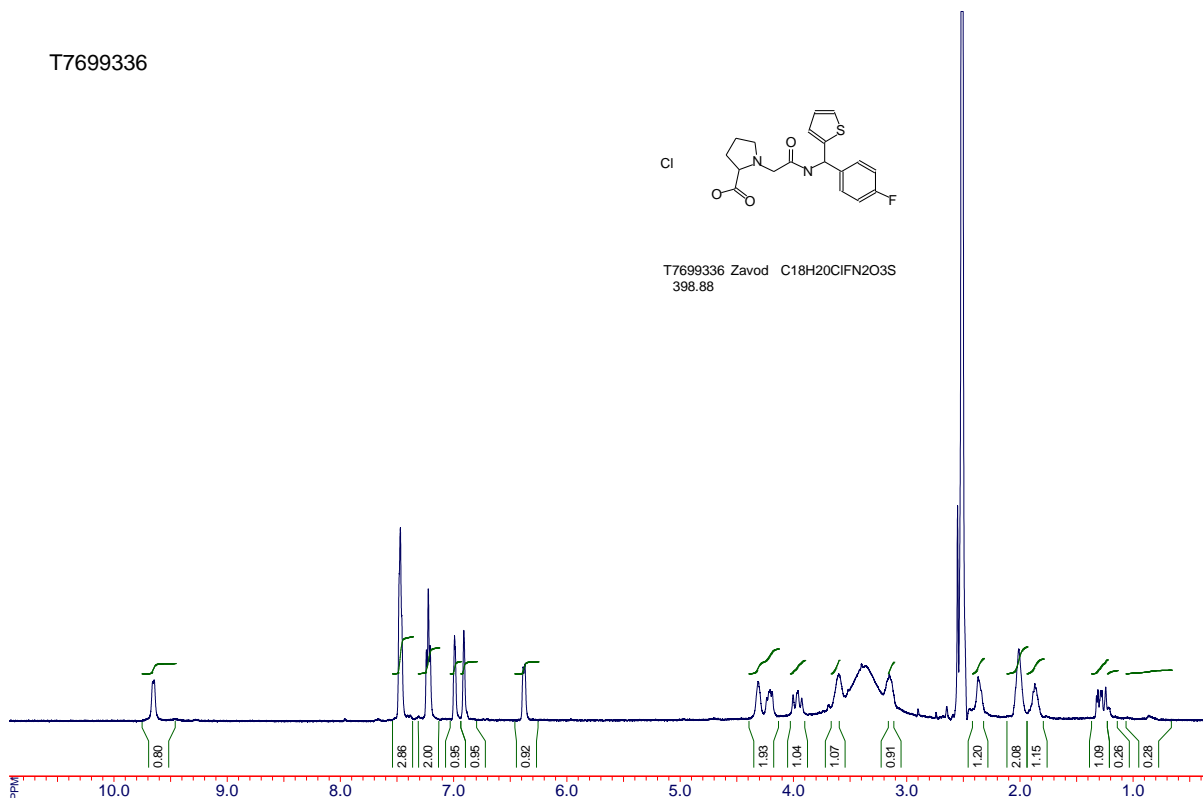

|                     |                     |                  |         |                            |                                      |
|---------------------|---------------------|------------------|---------|----------------------------|--------------------------------------|
| File name: T7699336 | Zhelezniak Angelika | SF: 500.0680 MHz | NSC: 1  | PW: 0.00 usec, RG: 128     | <b>*T7699336*</b>                    |
| Date: 06-Aug-2013   | Solvent: DMSO       | SW: 8503 Hz      | TE: 0 K | AQ: 1.93 sec, RD: 0.00 sec | Parameter file, XWIN-NMR Version 3.5 |

5804482\$1

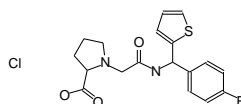

5804482\$1 C18H20ClFN2O3S 398.88

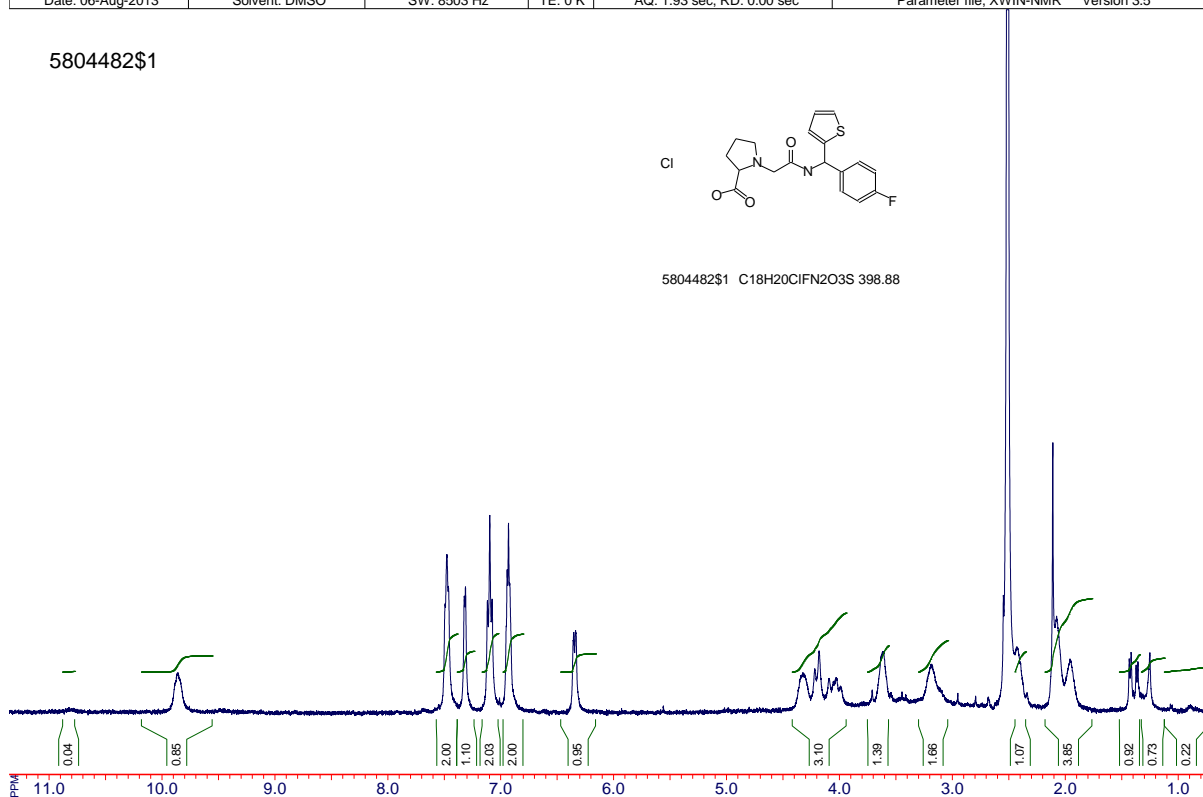

|                       |                      |                  |           |                            |                     |
|-----------------------|----------------------|------------------|-----------|----------------------------|---------------------|
| File name: 5804482\$1 | Zhelezniak Angelika  | SF: 399.9703 MHz | NSC: 0    | PW: 7.50 usec, RG: 32      | <b>*5804482\$1*</b> |
| Date: 10-Apr-2013     | Solvent: dmsd_d6+cd4 | SW: 6803 Hz      | TE: 293 K | AQ: 1.33 sec, RD: 0.00 sec |                     |

Z53113106

FL-1299

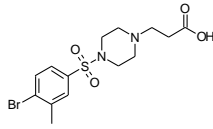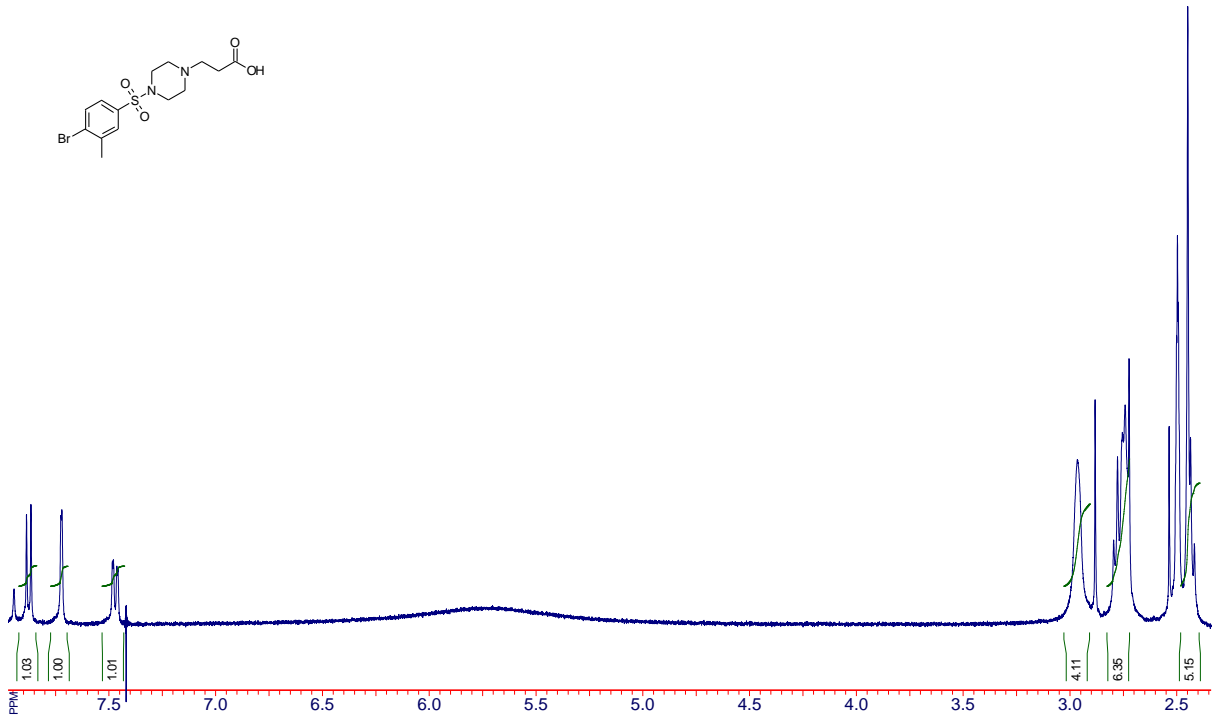

|                    |                         |                  |           |                            |                  |
|--------------------|-------------------------|------------------|-----------|----------------------------|------------------|
| File name: FL-1299 | Operator: Lab N 111     | SF: 400.3965 MHz | NSC: 0    | PW: 10.00 usec, RG: 30     | SF: 65536        |
| Date: 05-Apr-2004  | Solvent: DMSO-d6 + CCl4 | SW: 8000 Hz      | TE: 293 K | AQ: 2.00 sec, RD: 0.00 sec | <b>*FL-1299*</b> |

Z317025968

R1969058

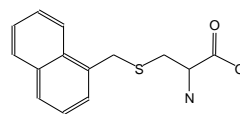

R1969058 C14H15NO2S 261.34

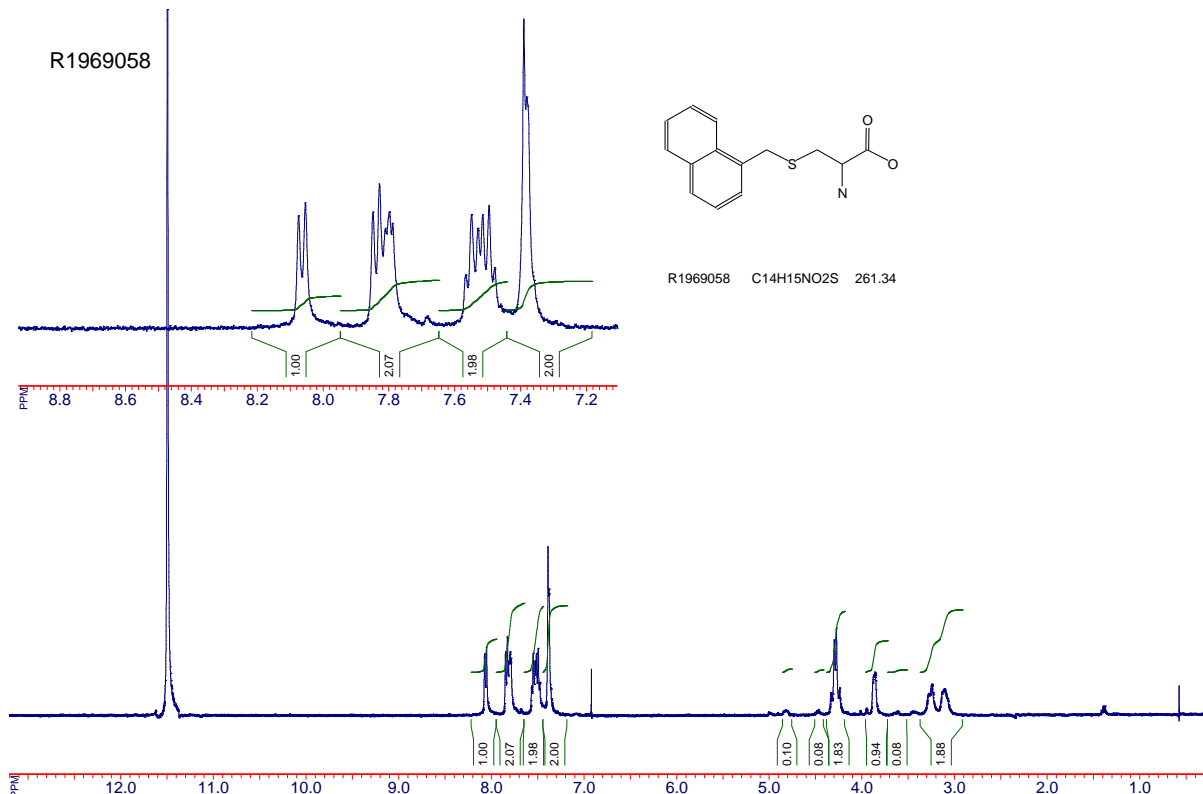

|                     |                   |                  |           |                            |                   |
|---------------------|-------------------|------------------|-----------|----------------------------|-------------------|
| File name: R1969058 | Operator: Reutova | SF: 399.9578 MHz | NSC: 0    | PW: 7.50 usec, RG: 32      | SI: 32768         |
| Date: 02-Mar-2012   | Solvent: cf3cood  | SW: 5597 Hz      | TE: 293 K | AQ: 1.61 sec, RD: 0.00 sec | <b>*R1969058*</b> |

Z1541759893

T7675698

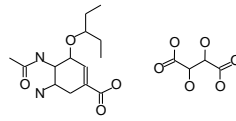

434.44

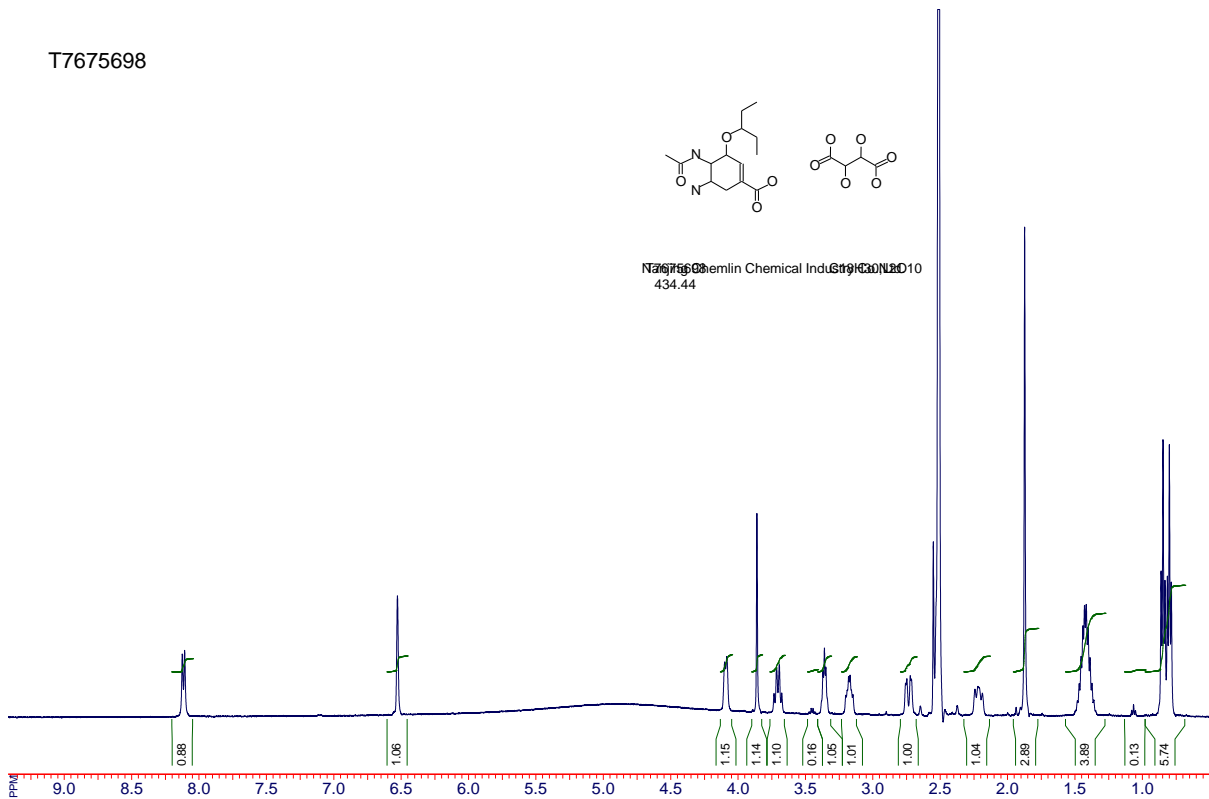

|                     |                     |                  |         |                            |                                      |
|---------------------|---------------------|------------------|---------|----------------------------|--------------------------------------|
| File name: T7675698 | Zhelezniak Angelika | SF: 500.0680 MHz | NSC: 1  | PW: 0.00 usec, RG: 128     | <b>*T7675698*</b>                    |
| Date: 06-Aug-2013   | Solvent: DMSO       | SW: 8503 Hz      | TE: 0 K | AQ: 1.93 sec, RD: 0.00 sec | Parameter file, XWIN-NMR Version 3.5 |

MaxPeak: 100.00%  
Ret\_Time: 0.710 min

# R1919891

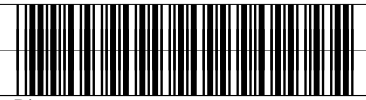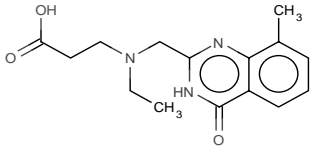

**Mol Wt** 289.33  
**Exact Mass** 289.16

| # | Time  | Area%  |
|---|-------|--------|
| 1 | 0.710 | 100.00 |

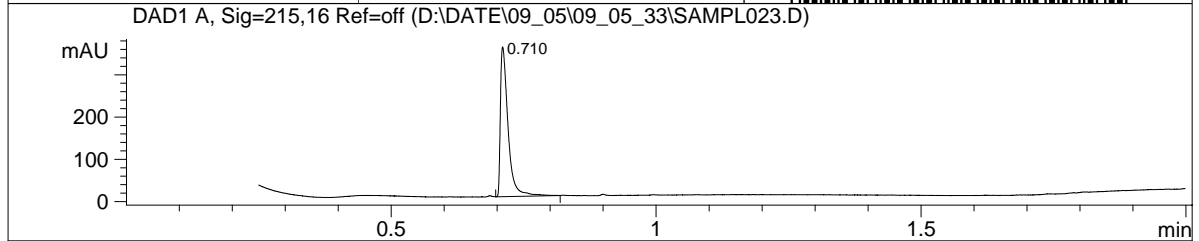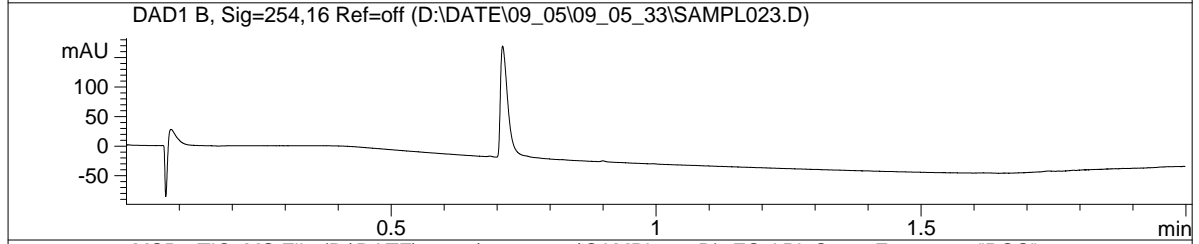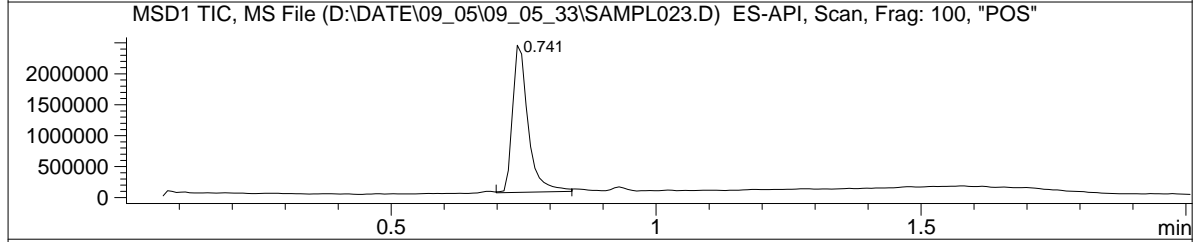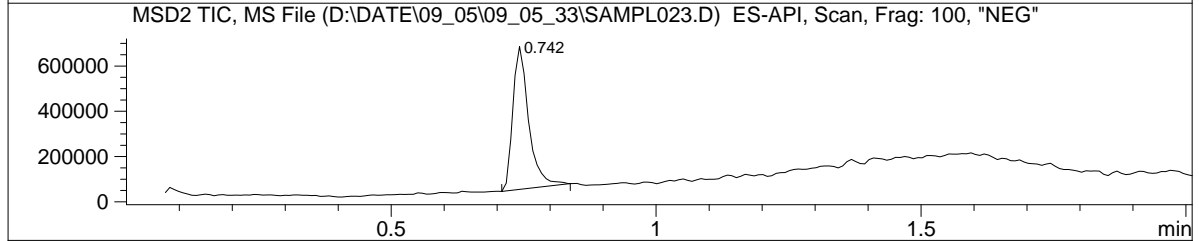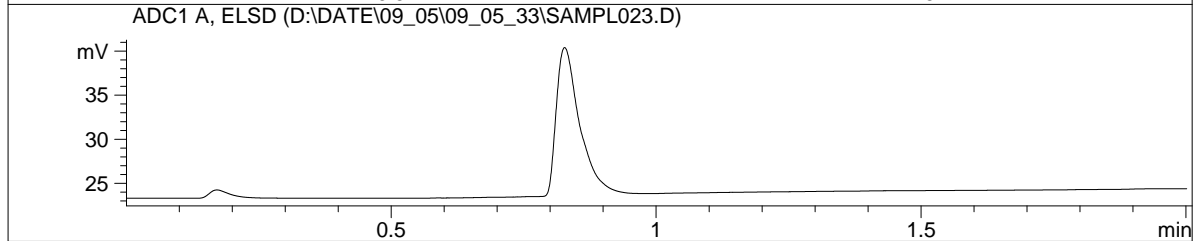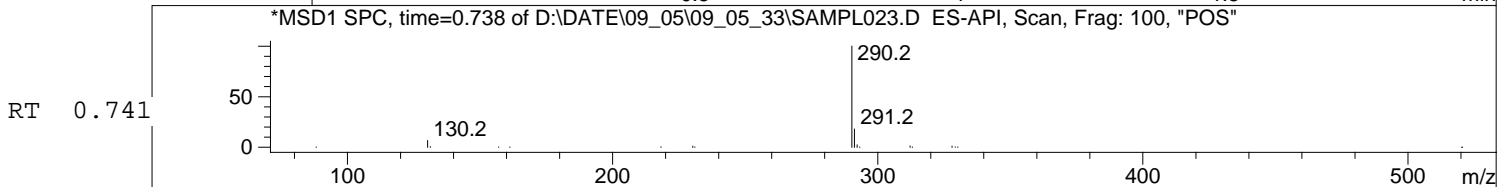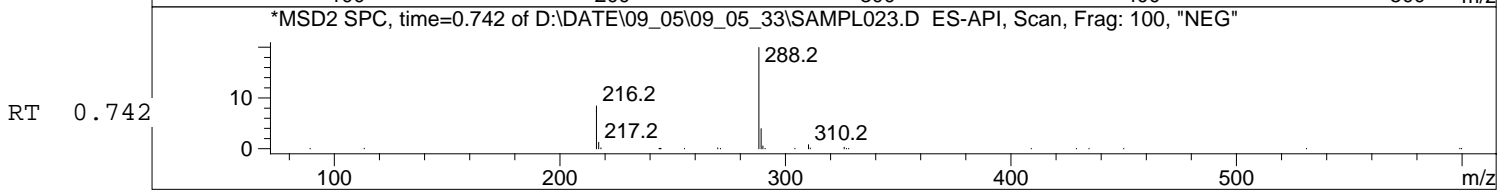



MaxPeak: 62.64%  
Ret\_Time: 1.012 min

# 5804504

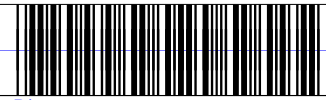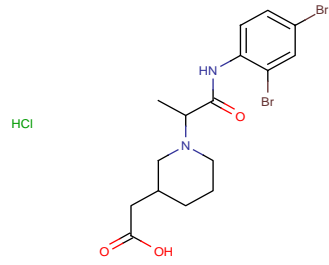

**Mol Wt** 484.61  
**Exact Mass** 448.01

| # | Time  | Area% |
|---|-------|-------|
| 1 | 1.002 | 37.36 |
| 2 | 1.012 | 62.64 |

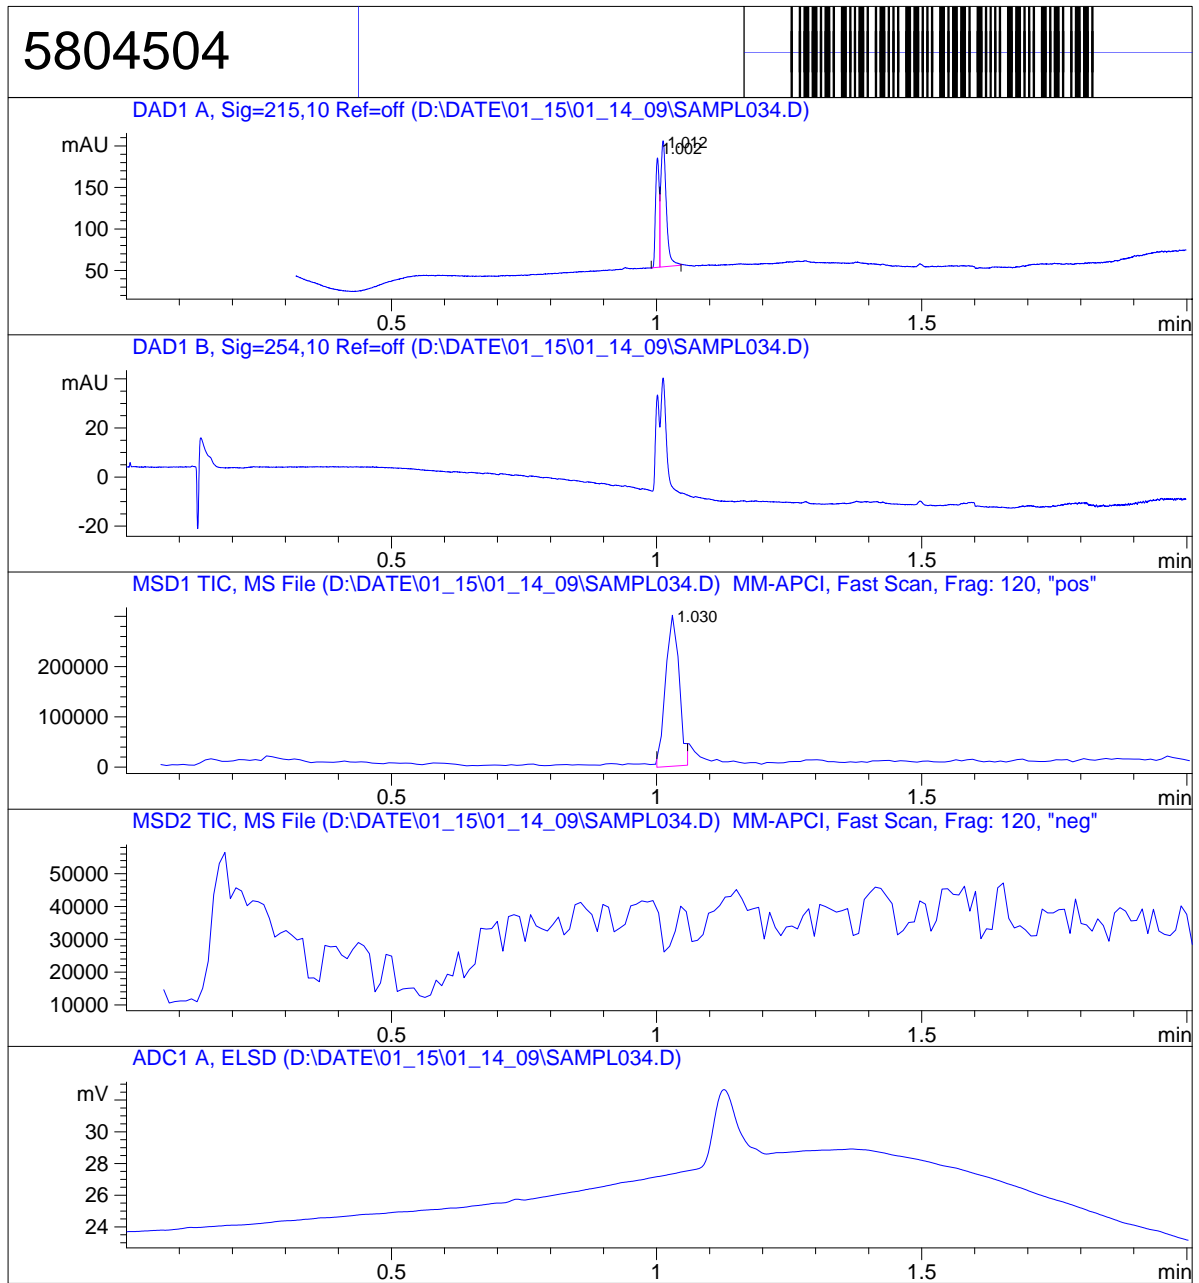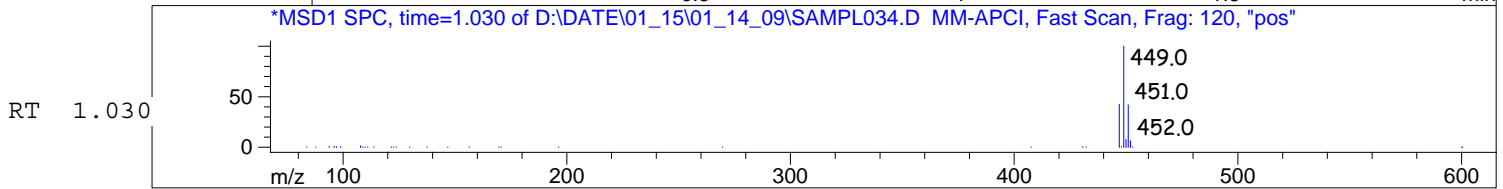

MaxPeak: 100.00%  
Ret\_Time: 1.056 min

# 6008100

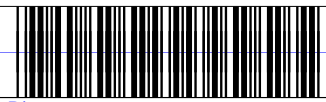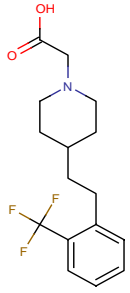

**Mol Wt** 351.79  
**Exact Mass** 315.18

| # | Time  | Area%  |
|---|-------|--------|
| 1 | 1.056 | 100.00 |

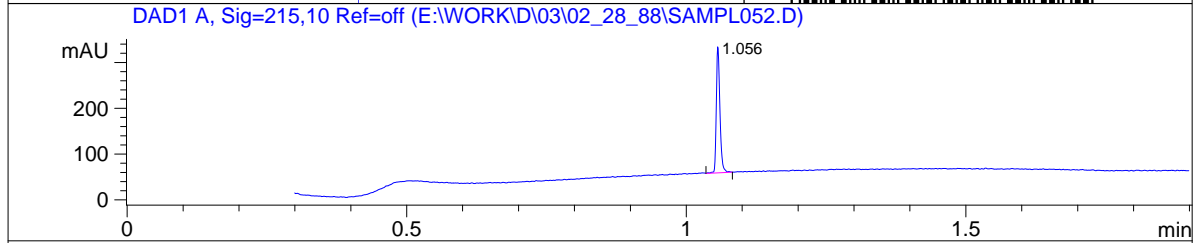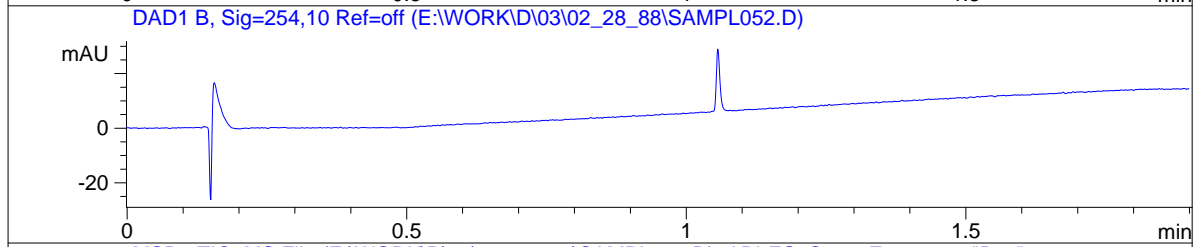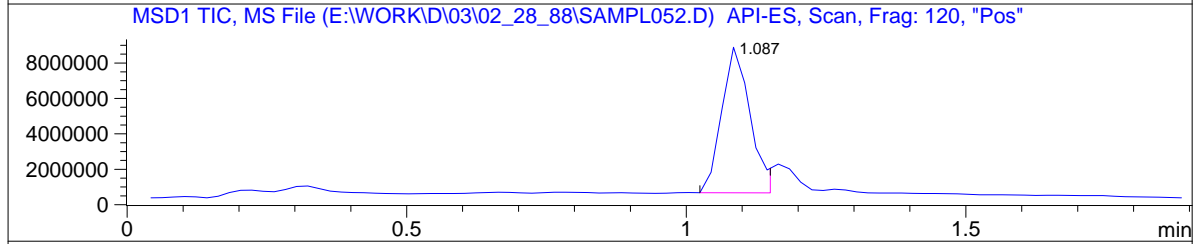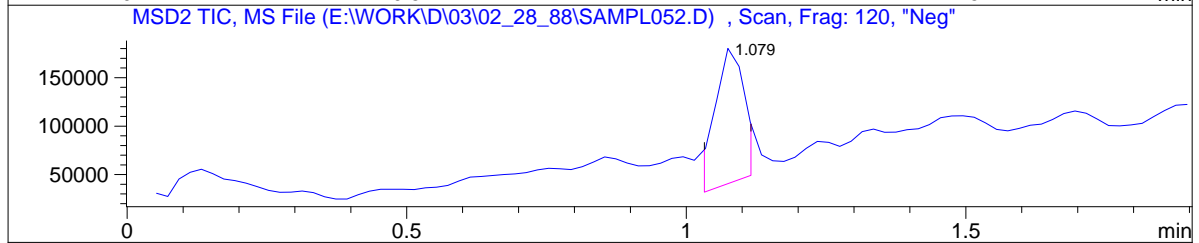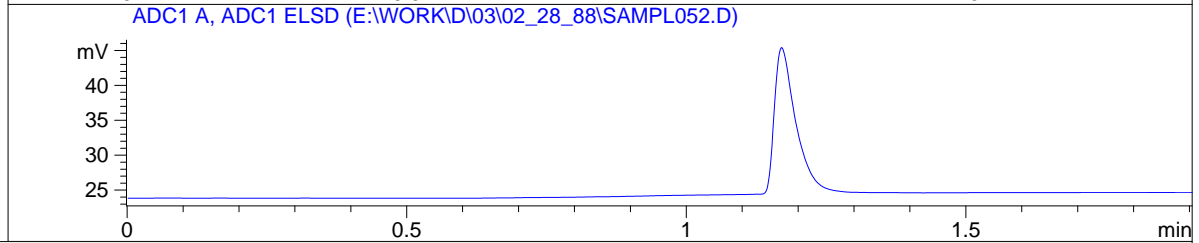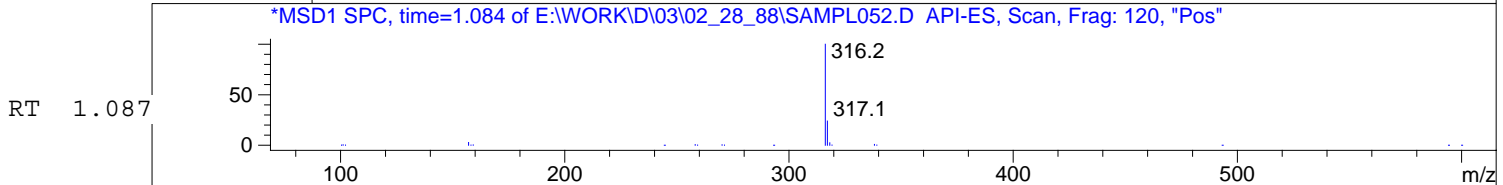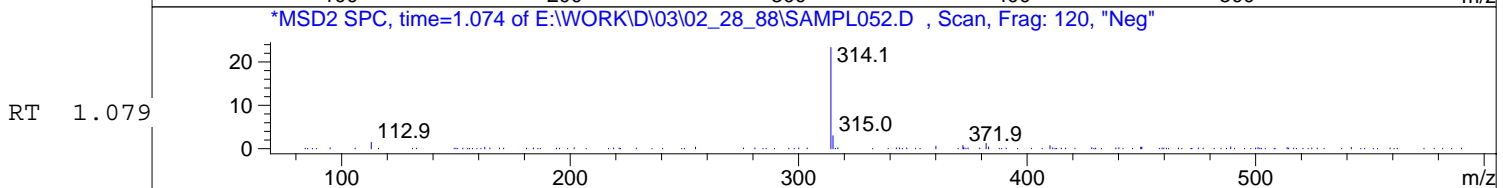

MaxPeak: 95.58%  
Ret\_Time: 0.797 min

6008276

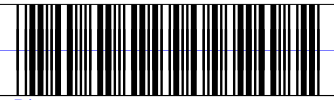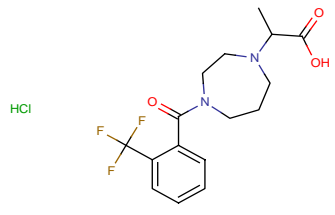

Mol Wt **380.79**  
Exact Mass **344.16**

| # | Time  | Area% |
|---|-------|-------|
| 1 | 0.797 | 95.58 |
| 2 | 0.966 | 4.42  |

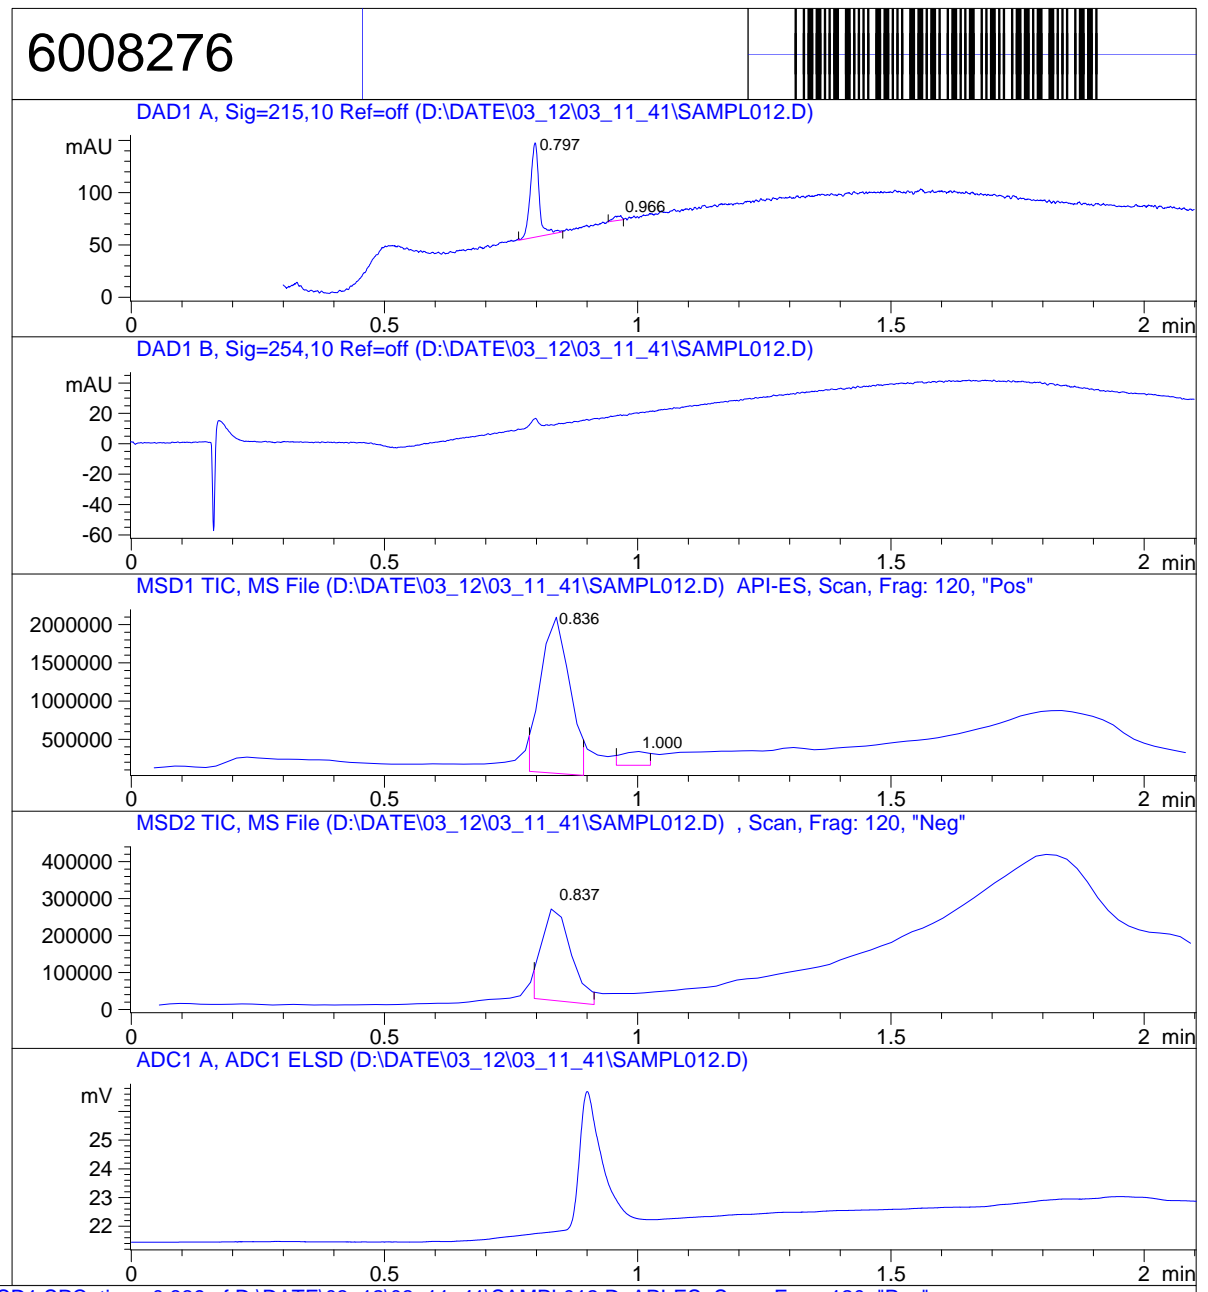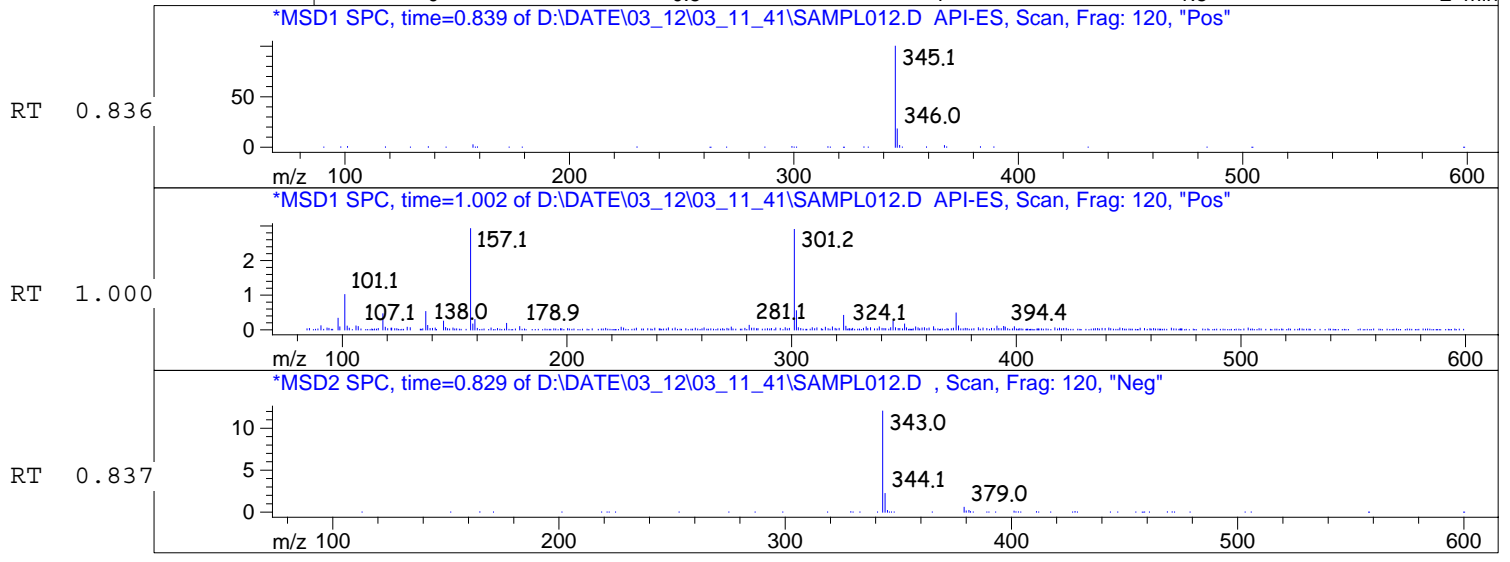

MaxPeak: 100.00%  
Ret\_Time: 0.907 min

# T7621214

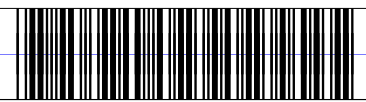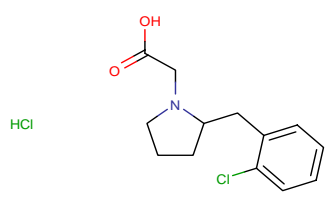

**Mol Wt** 290.19  
**Exact Mass** 253.11

| # | Time  | Area%  |
|---|-------|--------|
| 1 | 0.907 | 100.00 |

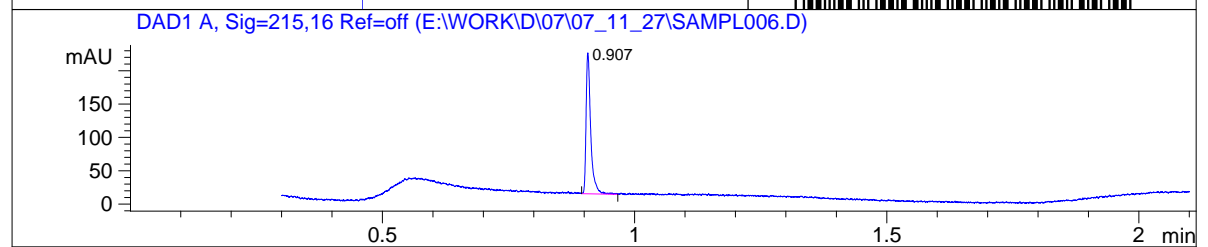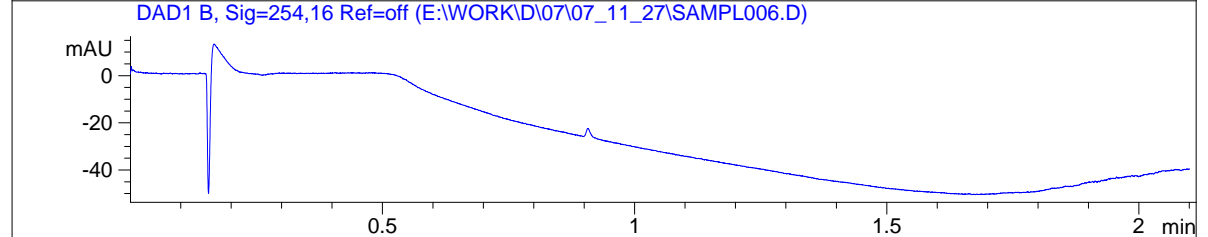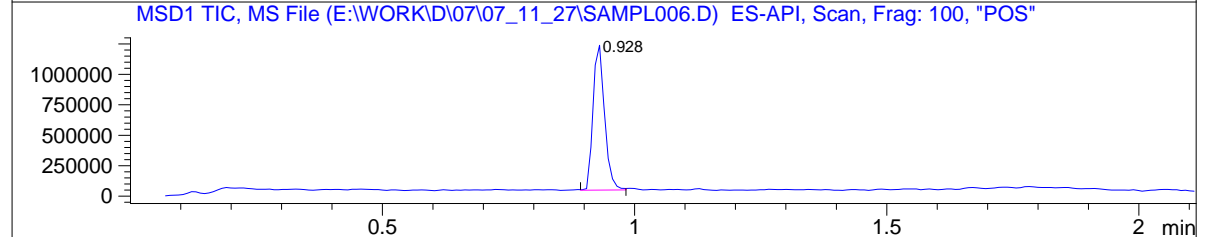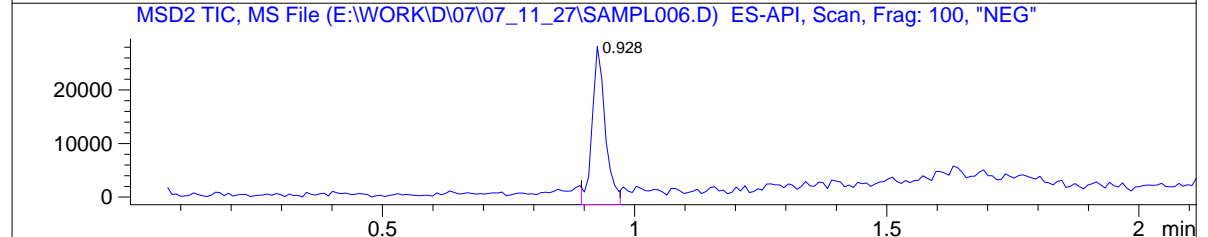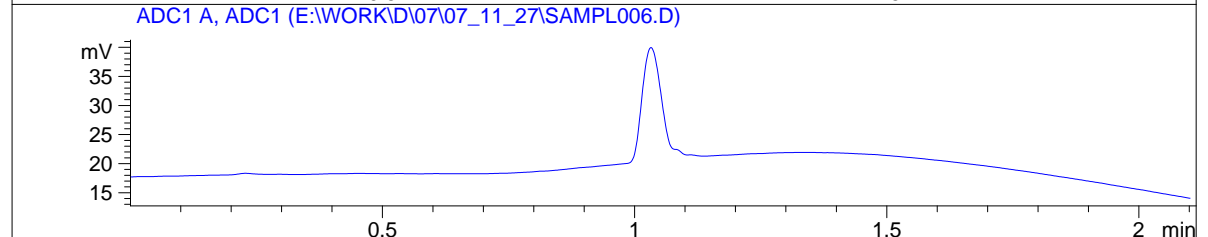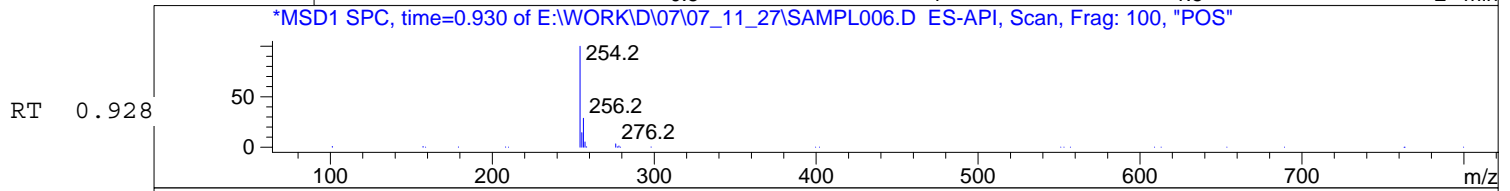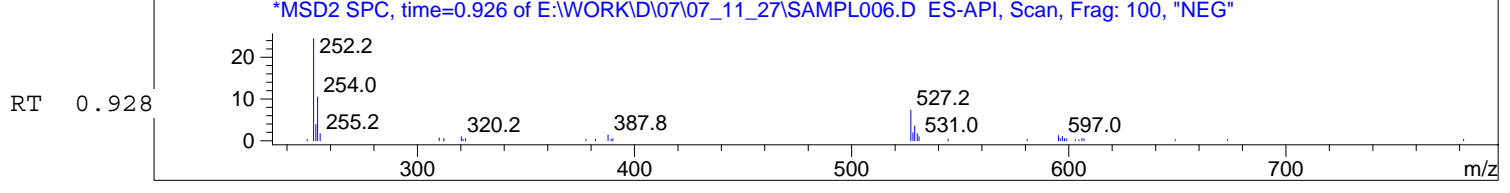

MaxPeak: 100.00%  
Ret\_Time: 0.904 min

# 6008064\$1

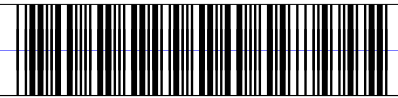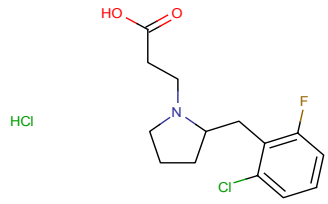

**Mol Wt** 322.2  
**Exact Mass** 285.12

| # | Time  | Area%  |
|---|-------|--------|
| 1 | 0.904 | 100.00 |

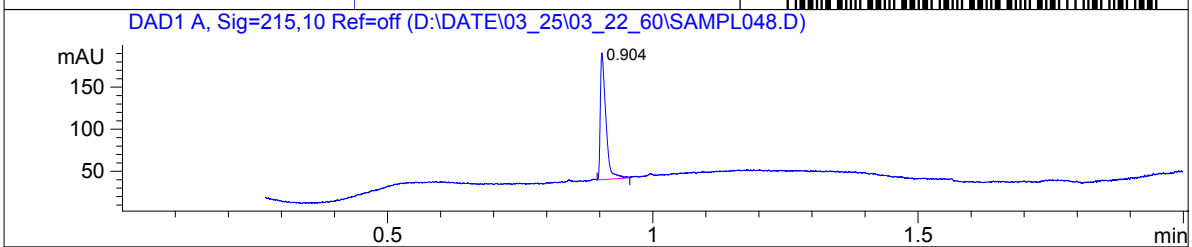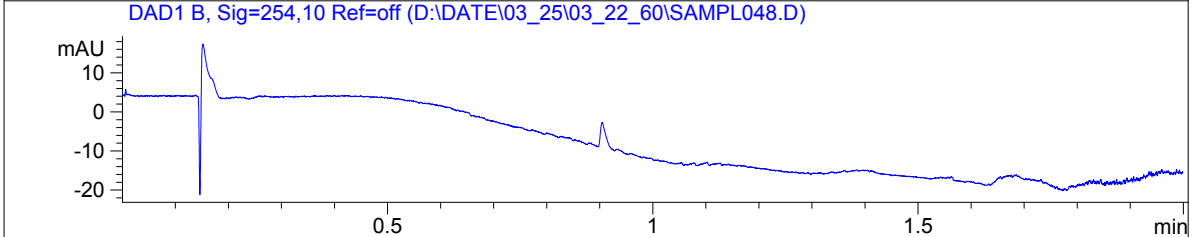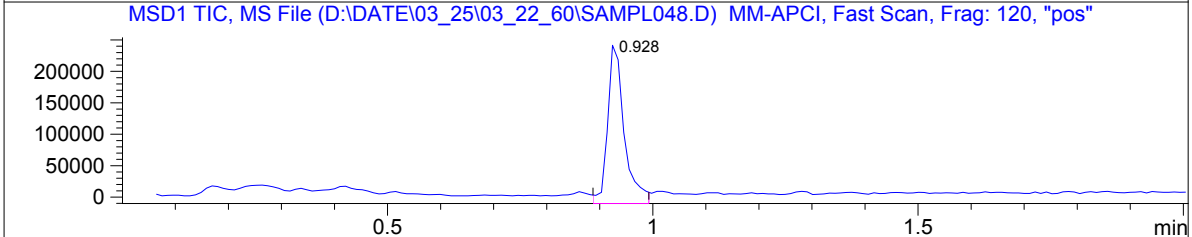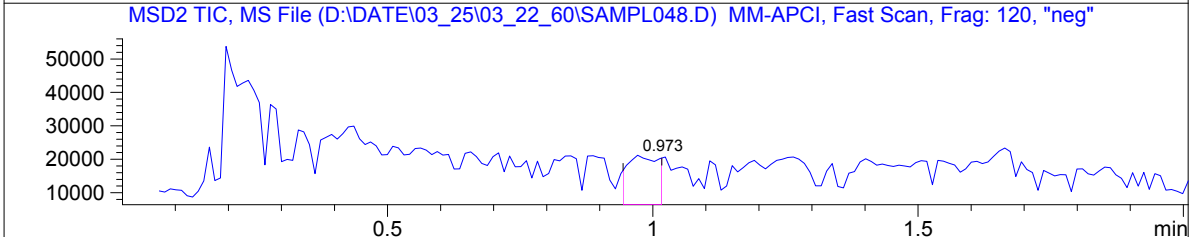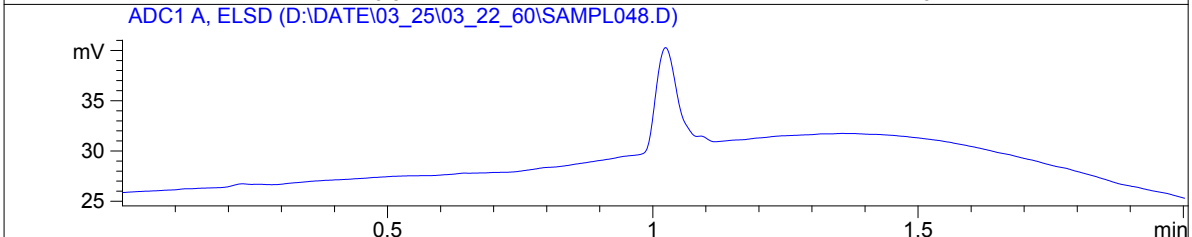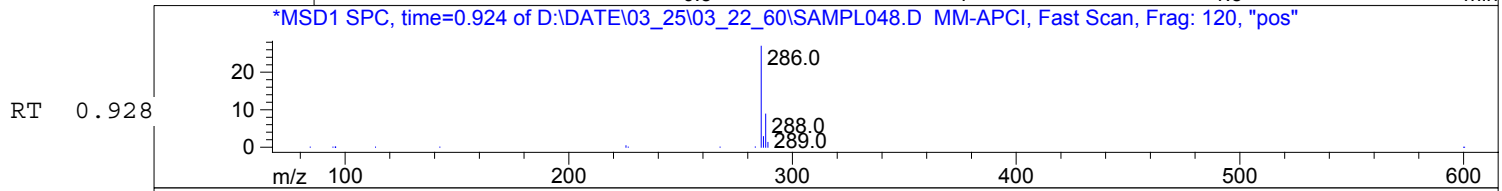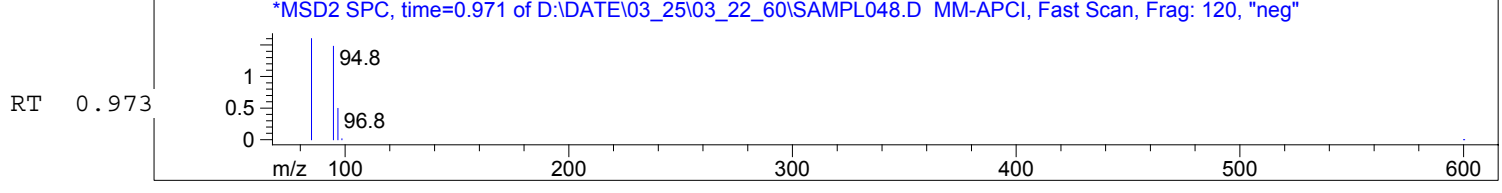

MaxPeak: 100.00%  
Ret\_Time: 0.984 min

6008199\$22

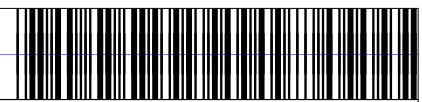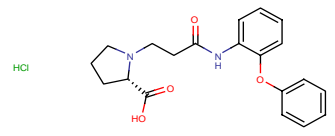

Mol Wt 390.86  
Exact Mass 354.18

| # | Time  | Area%  |
|---|-------|--------|
| 1 | 0.984 | 100.00 |

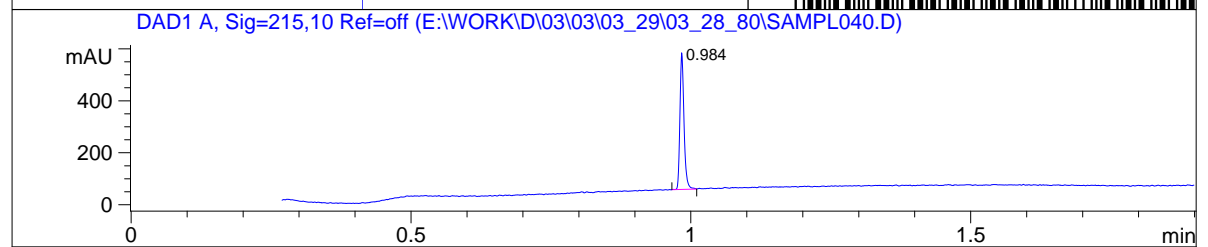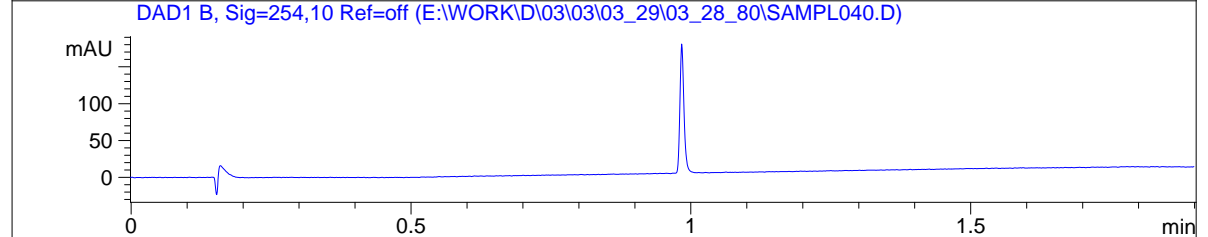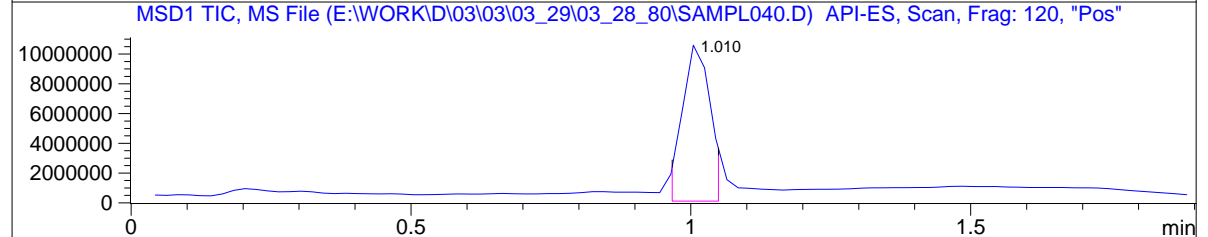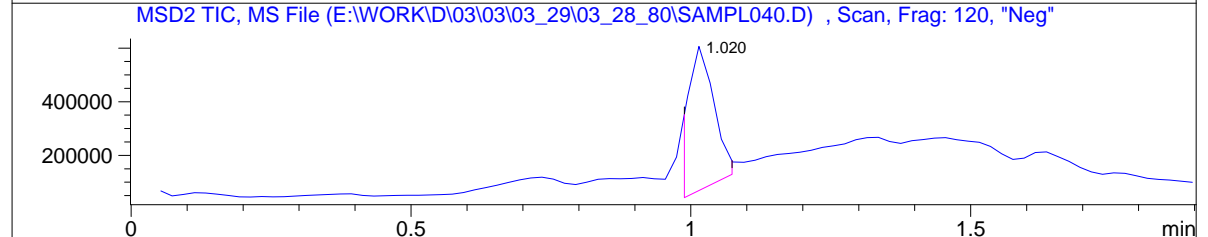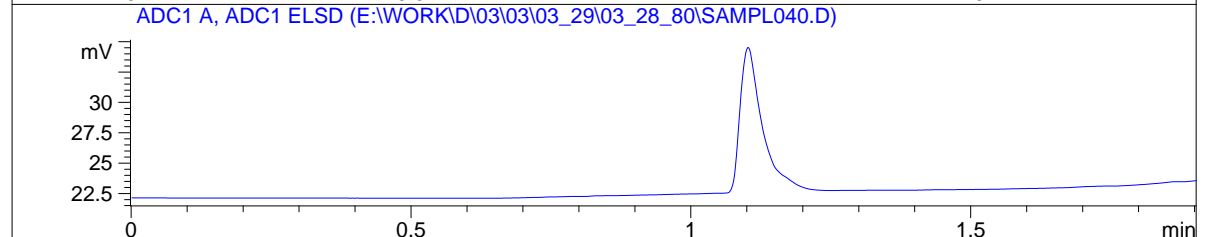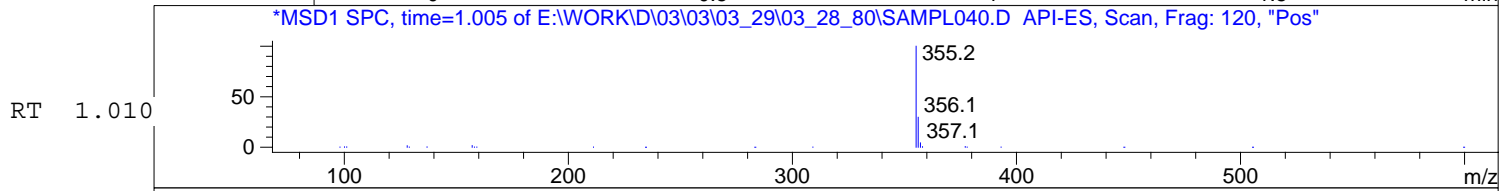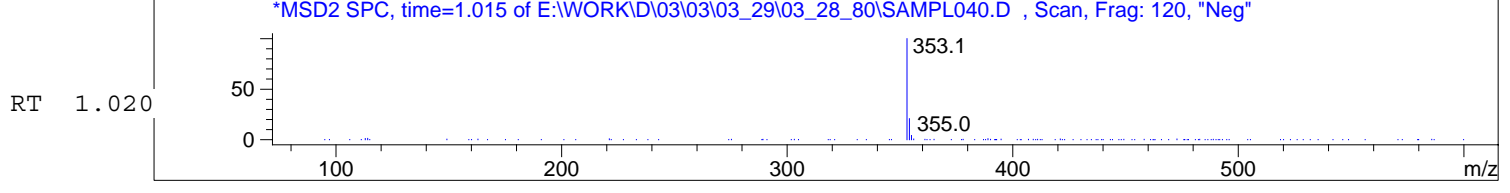

MaxPeak: 100.00%  
Ret\_Time: 0.856 min

5937301\$2

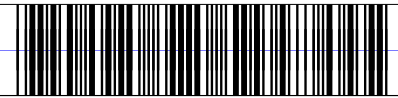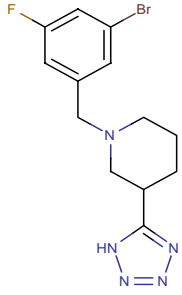

Mol Wt 340.19  
Exact Mass 339.07

| # | Time  | Area%  |
|---|-------|--------|
| 1 | 0.856 | 100.00 |

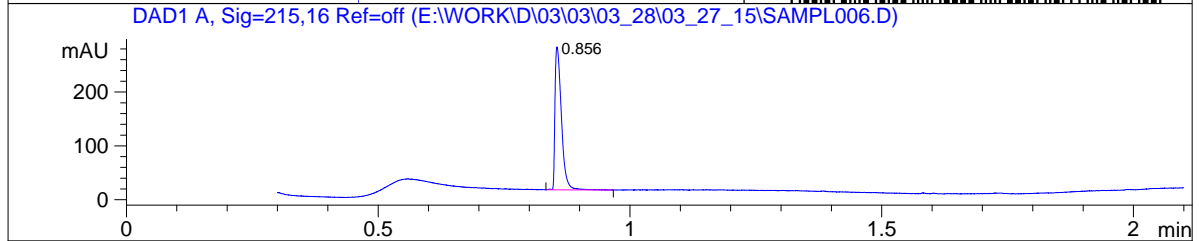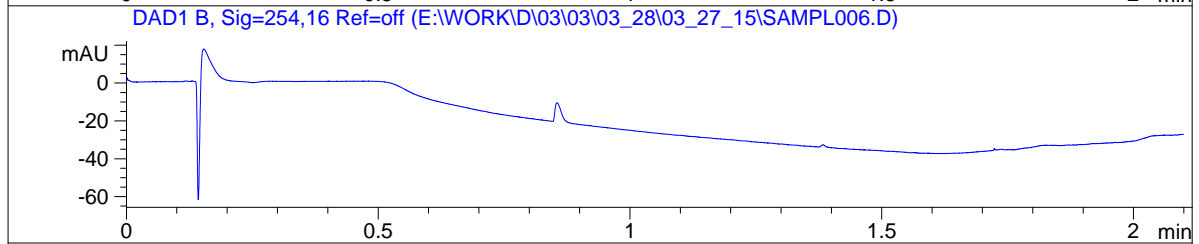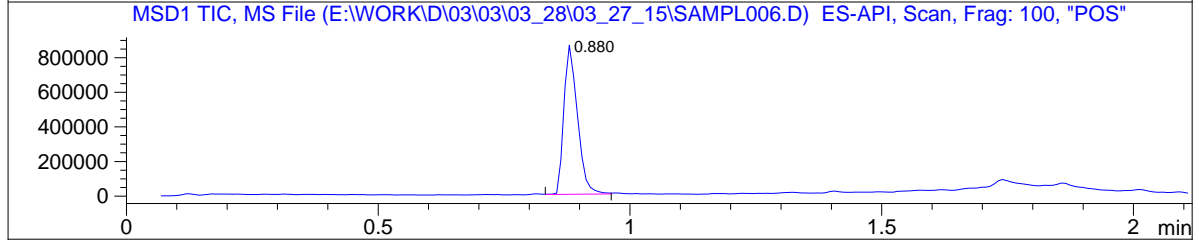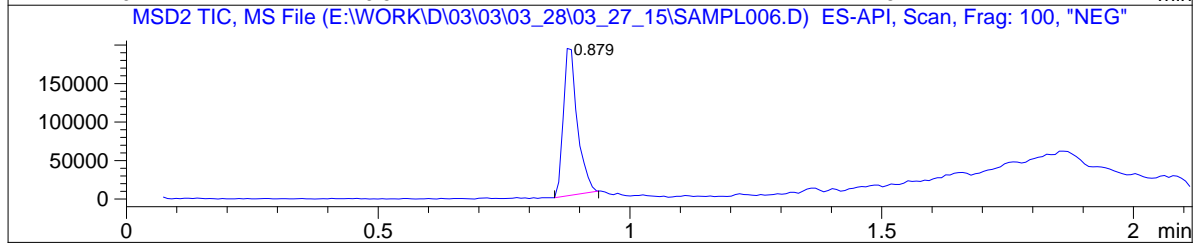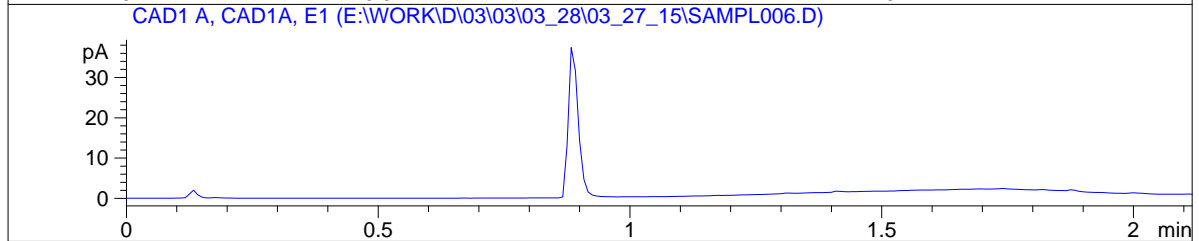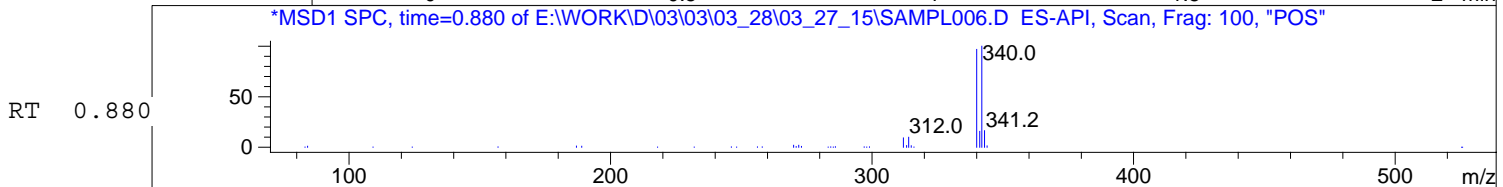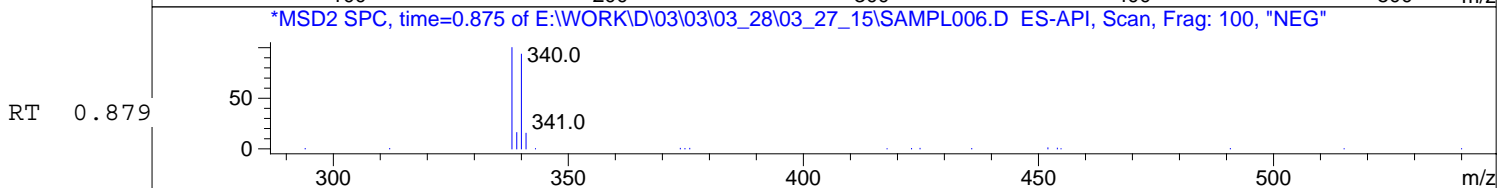

MaxPeak: 100.00%  
Ret\_Time: 0.952 min

# 6008184

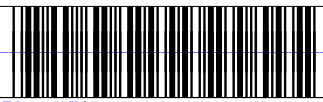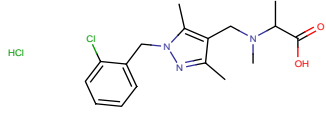

**Mol Wt** 372.29  
**Exact Mass** 335.17

| # | Time  | Area%  |
|---|-------|--------|
| 1 | 0.952 | 100.00 |

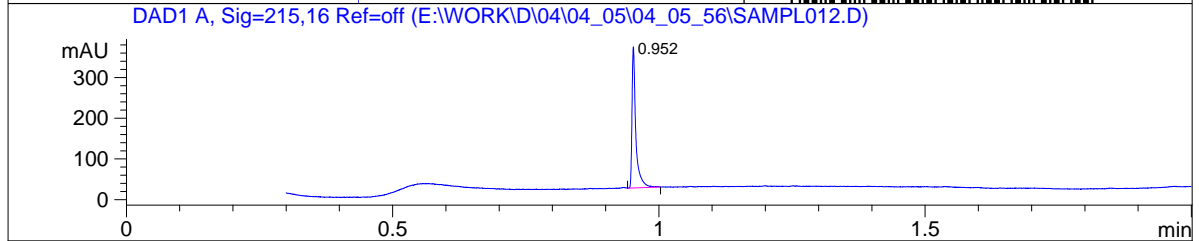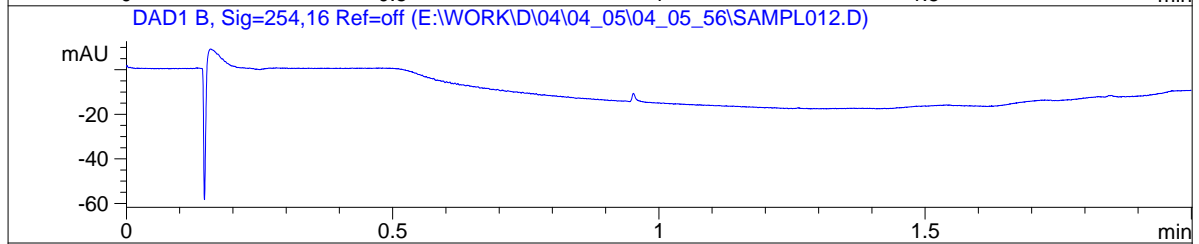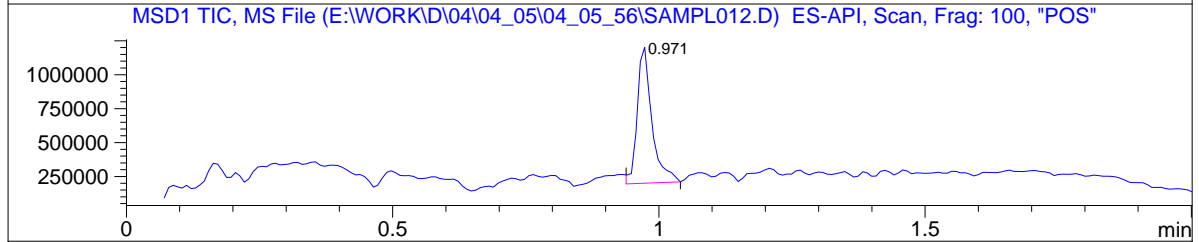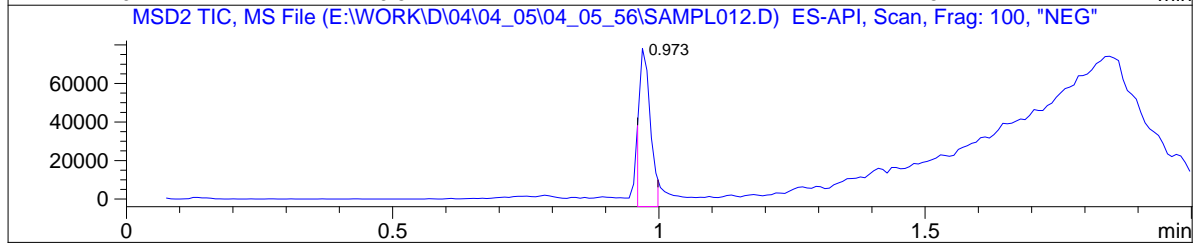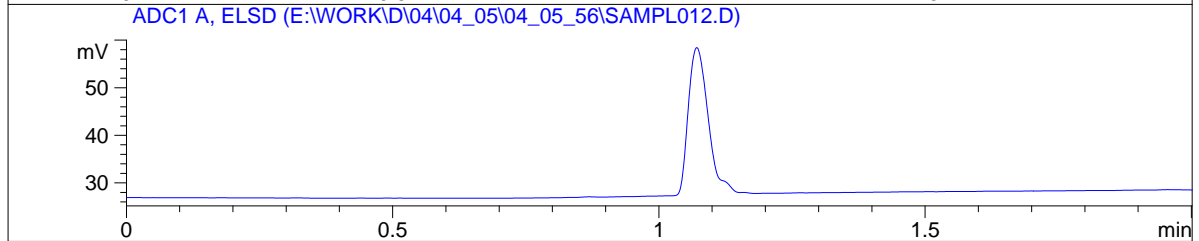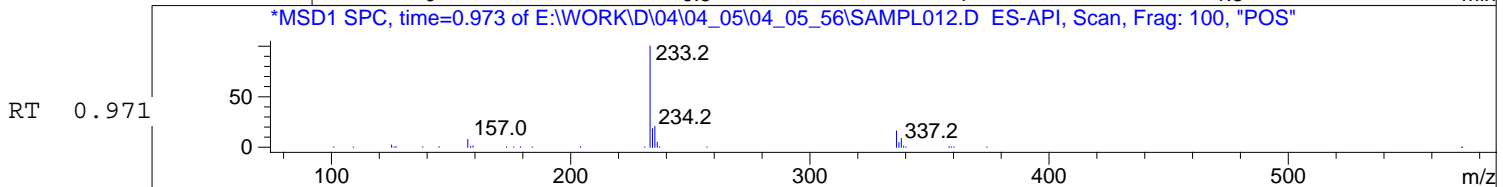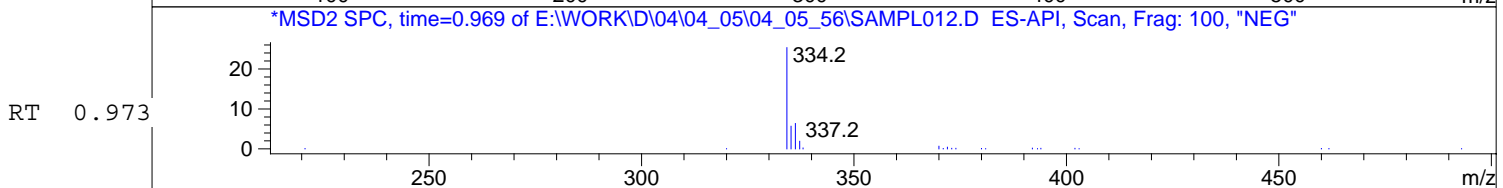



MaxPeak: 100.00%  
Ret\_Time: 1.027 min

# 5804482\$1

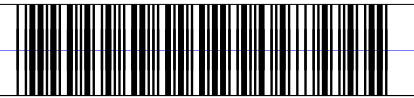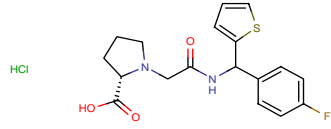

**Mol Wt** 398.88  
**Exact Mass** 362.13

| # | Time  | Area%  |
|---|-------|--------|
| 1 | 1.027 | 100.00 |

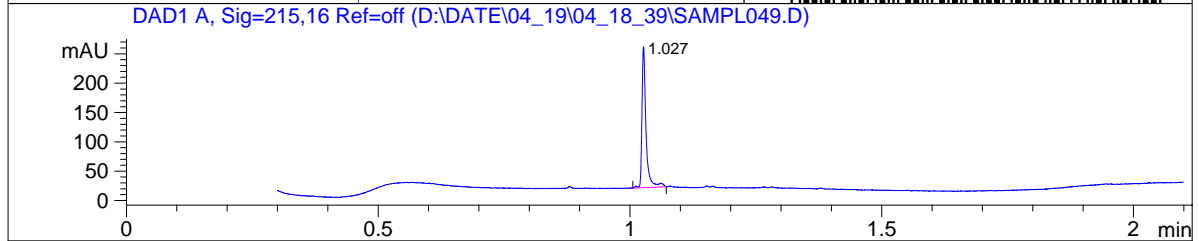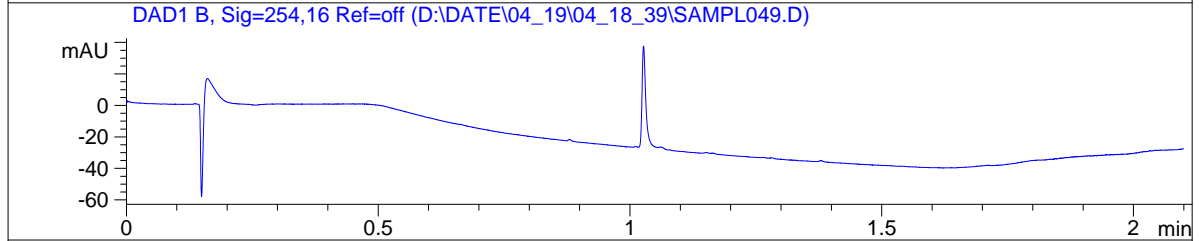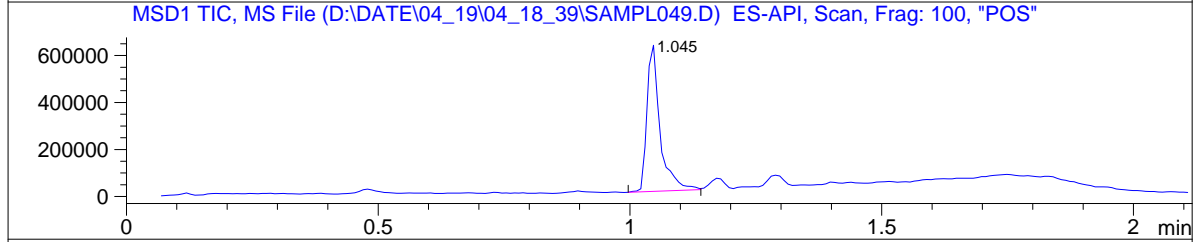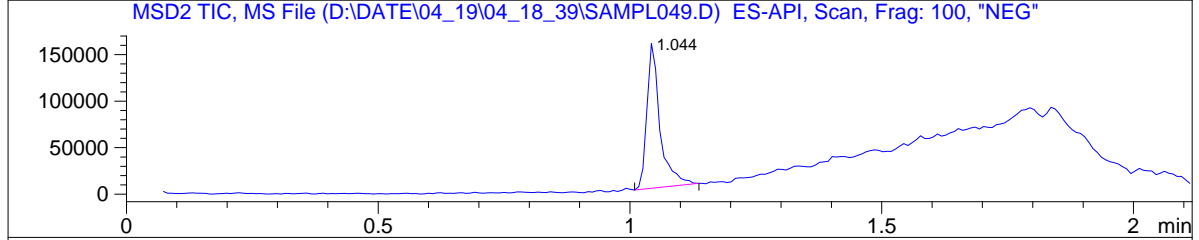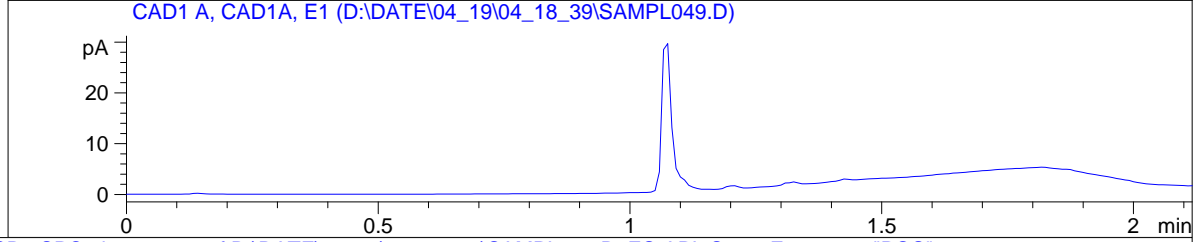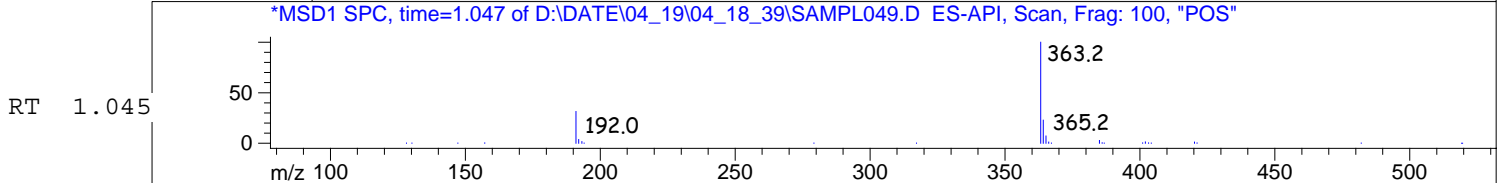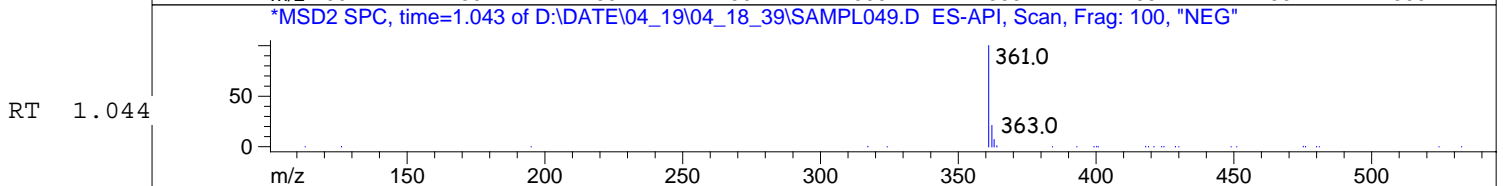

MaxPeak: 100.00%  
Ret\_Time: 1.015 min

# T5308507

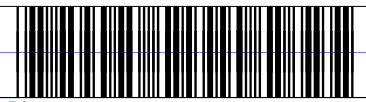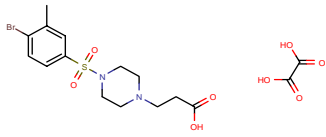

**Mol Wt** 481.32  
**Exact Mass** 392.04

| # | Time  | Area%  |
|---|-------|--------|
| 1 | 1.015 | 100.00 |

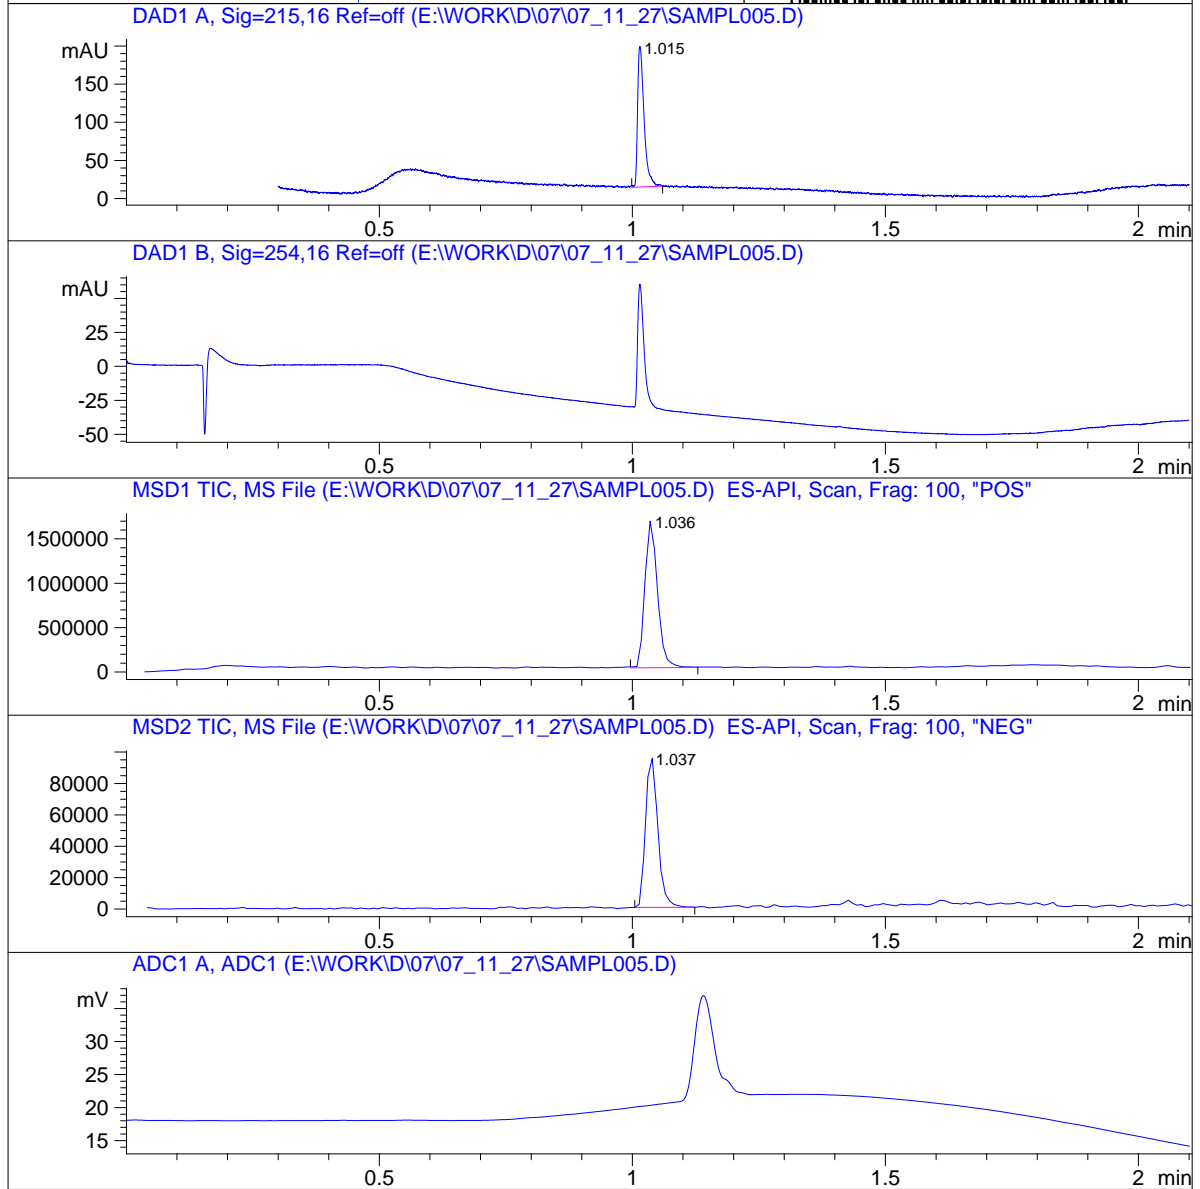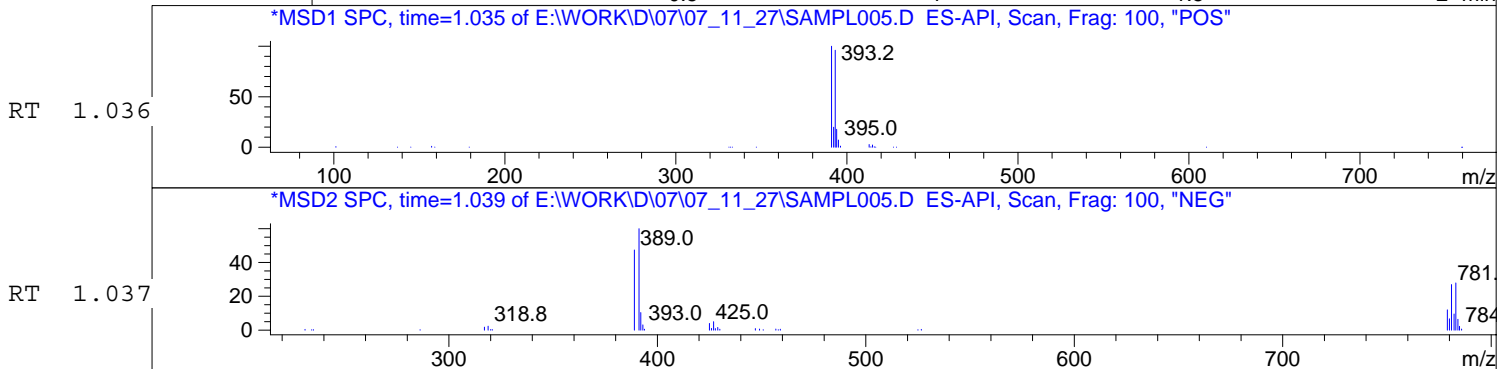

MaxPeak: 98.32%  
Ret\_Time: 0.823 min

# R1969058

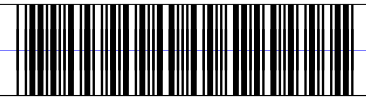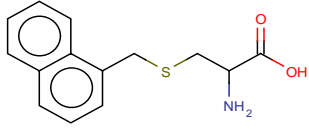

Mol Wt **261.339**  
Exact Mass **261.1**

| # | Time  | Area% |
|---|-------|-------|
| 1 | 0.823 | 98.32 |
| 2 | 1.032 | 1.68  |

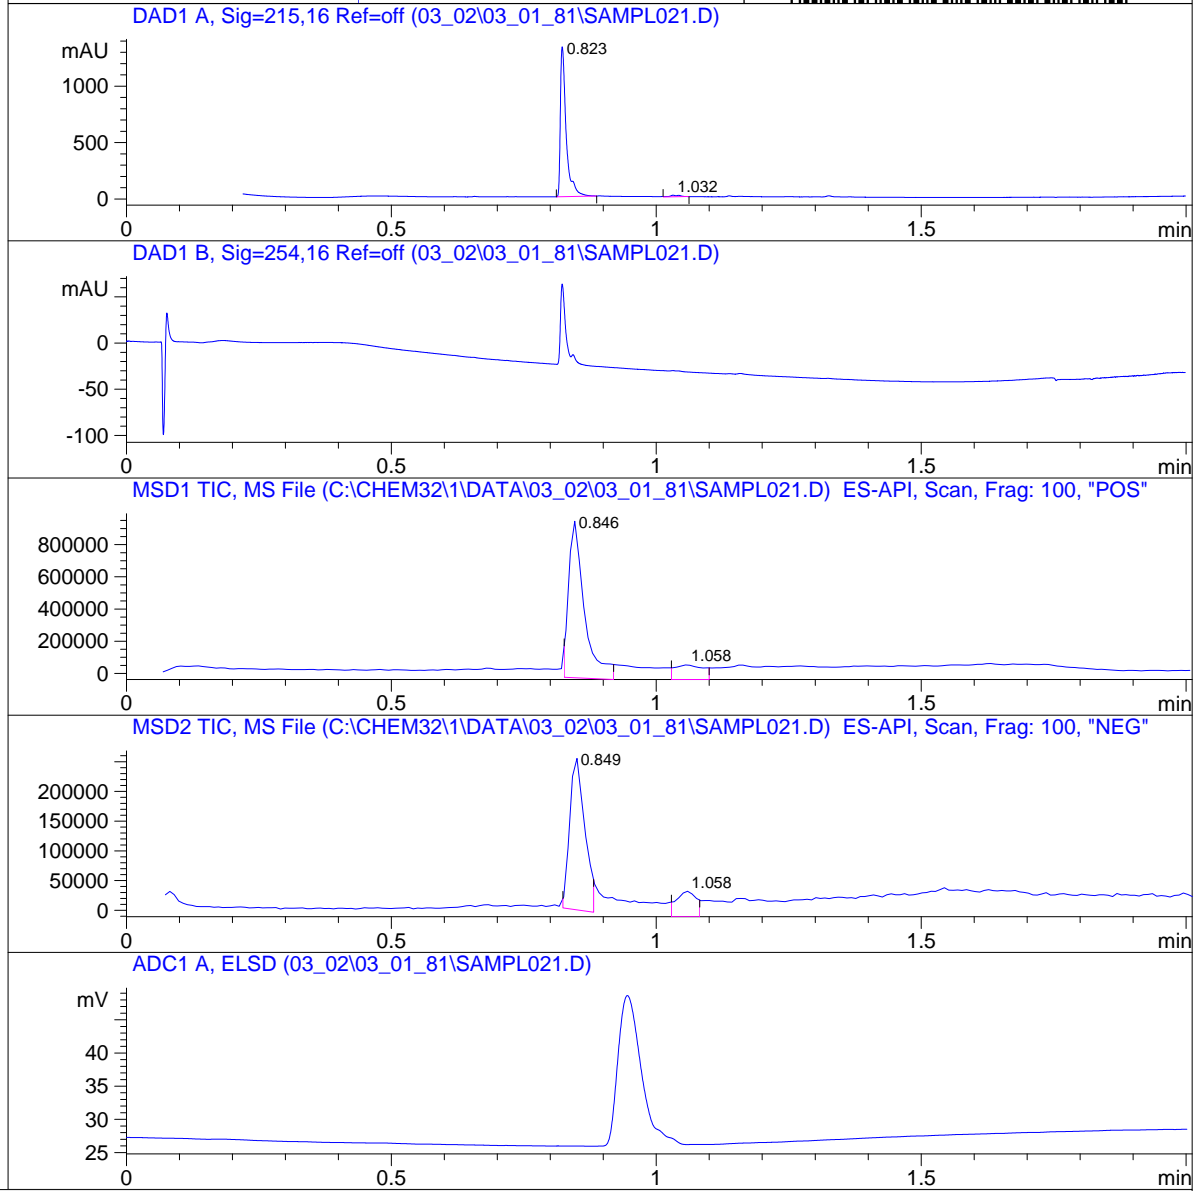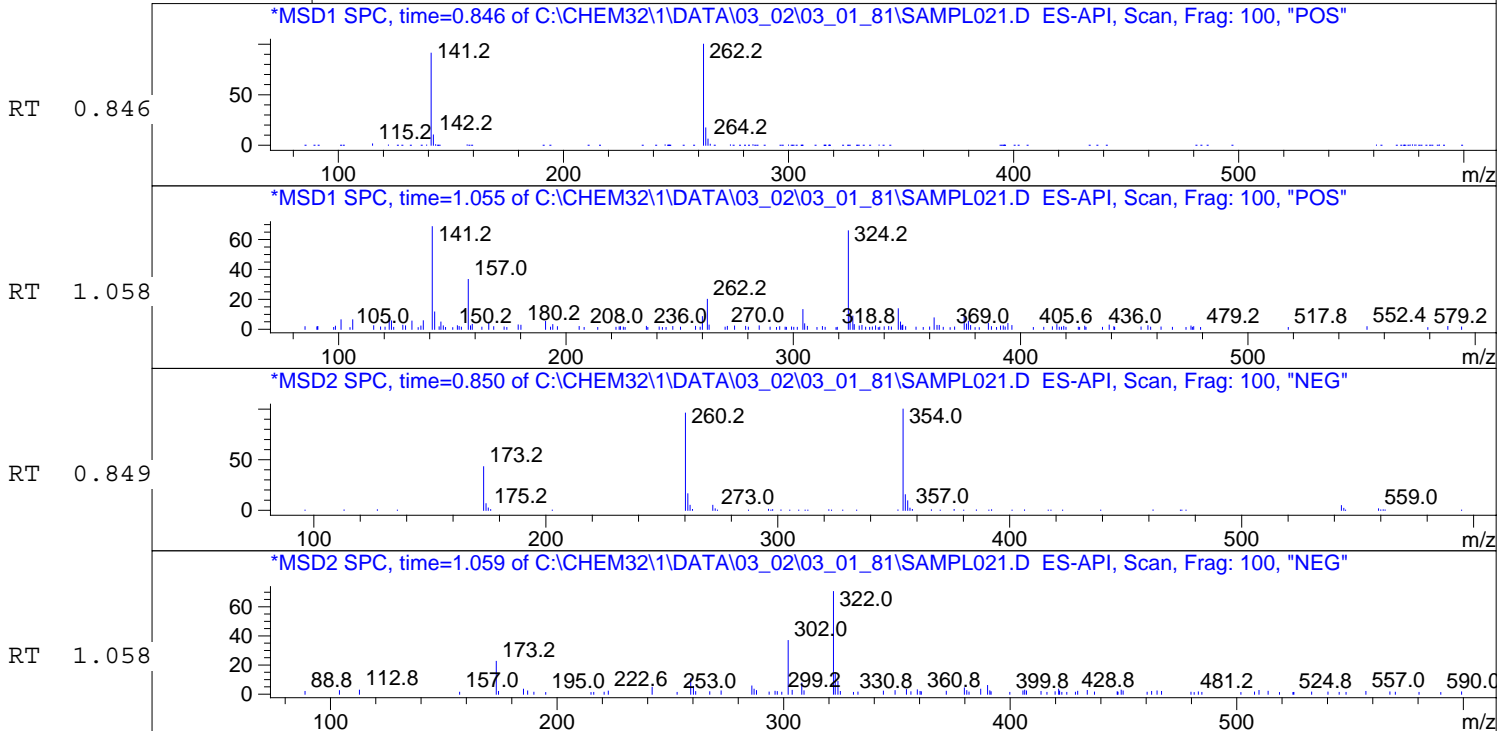

MaxPeak: 100.00%  
Ret\_Time: 0.748 min

R23970

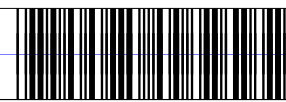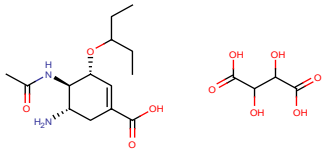

**Mol Wt** 434.44  
**Exact Mass** 284.2

| # | Time  | Area%  |
|---|-------|--------|
| 1 | 0.748 | 100.00 |

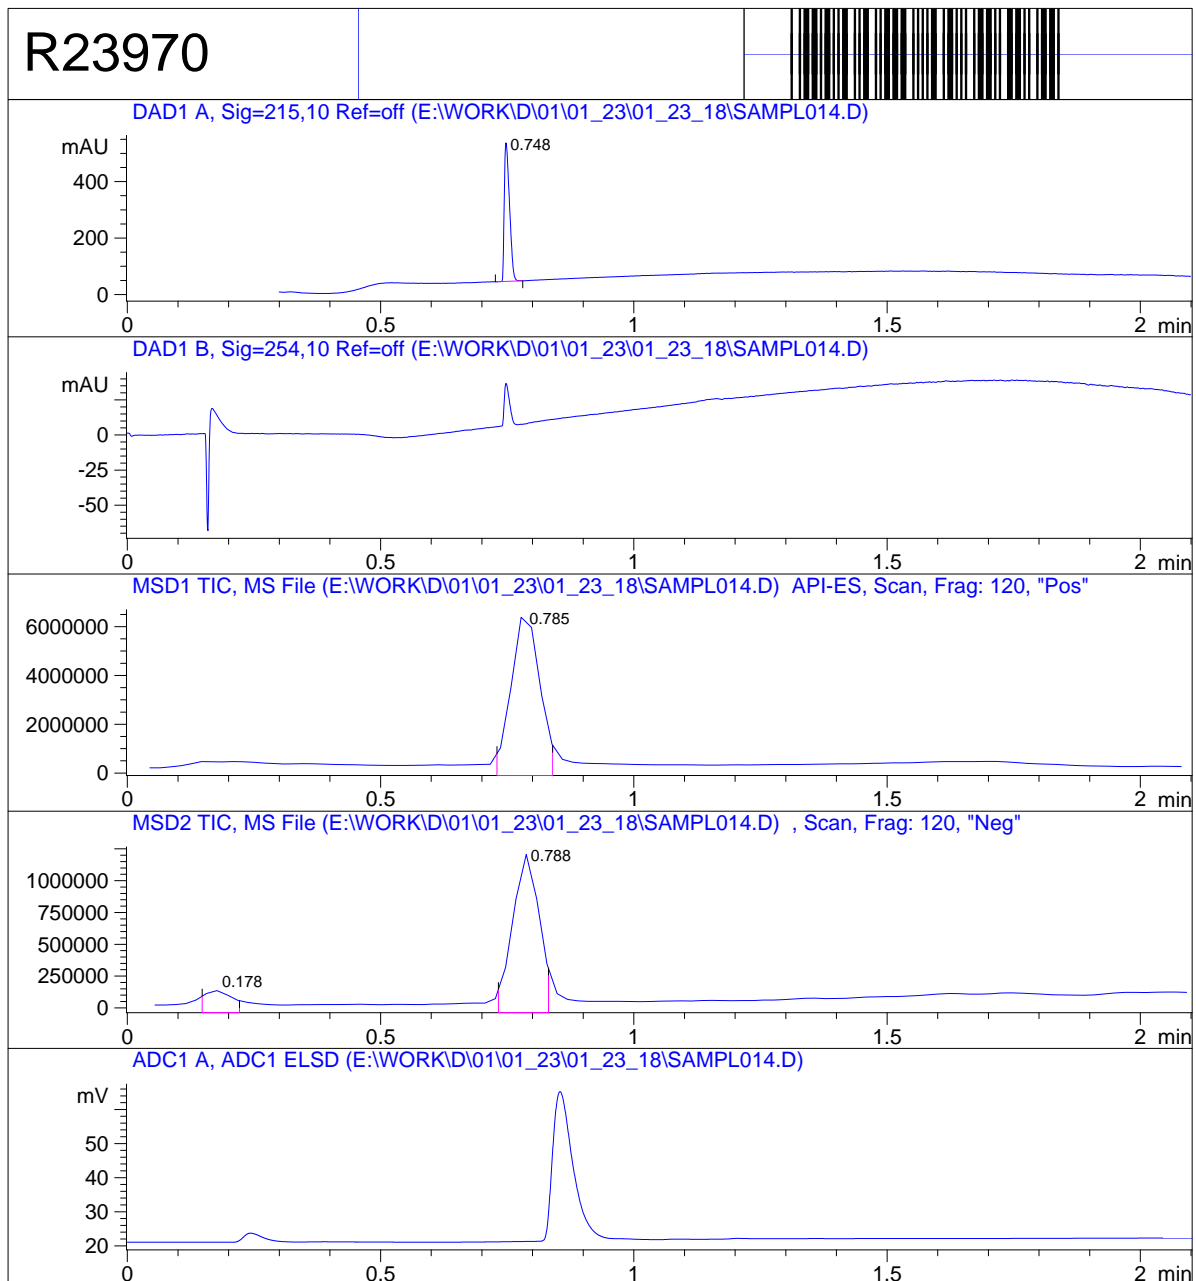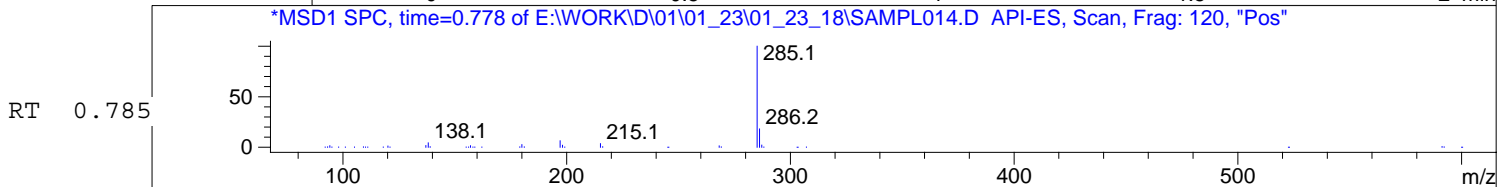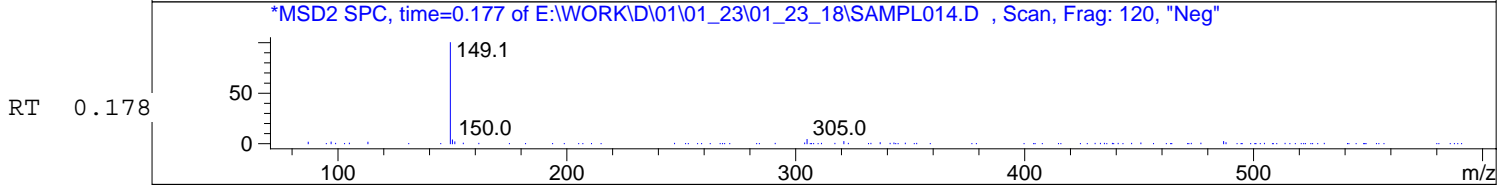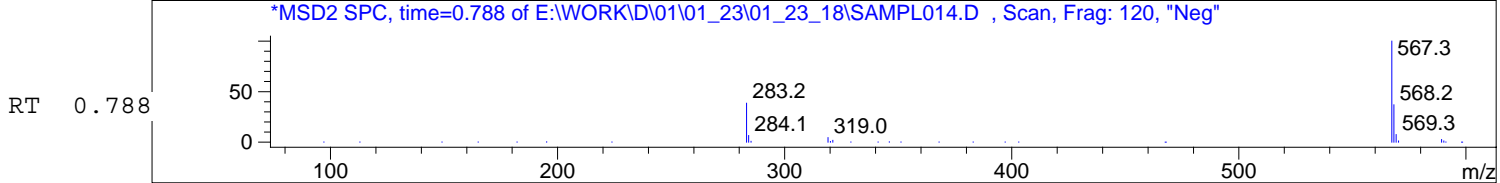

Supplement: jm5015428_si_001.pdf [file jm5015428_si_001.pdf]
